1  **$\alpha 7$  nicotinic acetylcholine receptor signaling modulates the inflammatory and iron homeostasis in**  
2 **fetal brain microglia**

3

4 **M. Cortes<sup>2\*</sup>, M. Cao<sup>1\*</sup>, H.L. Liu<sup>1</sup>, C.S. Moore<sup>3</sup>, L.D. Durosier<sup>1</sup>, P. Burns<sup>4</sup>, G. Fecteau<sup>4</sup>, A.**  
5 **Desrochers<sup>4</sup>, L. B. Barreiro<sup>5</sup>, J.P. Antel<sup>3</sup>, M.G. Frasch<sup>1,2,6</sup>**

6

7 *<sup>1</sup>Dept. of Obstetrics and Gynaecology and Dept. of Neurosciences, CHU Ste-Justine Research Centre,*  
8 *Faculty of Medicine,*

9 *<sup>2</sup>Animal Reproduction Research Centre (CRRRA), Faculty of Veterinary Medicine, Université de*  
10 *Montréal, Montréal, QC, Canada;*

11 *<sup>3</sup>Neuroimmunology Unit, Montréal Neurological Institute, McGill University, Montréal, QC, Canada;*

12 *<sup>4</sup>Dept. of Clinical Sciences, Faculty of Veterinary Medicine, Université de Montréal, QC, Canada;*

13 *<sup>5</sup>Dept. of Pediatrics, CHU Ste-Justine Research Centre, Faculty of Medicine, Université de Montréal,*  
14 *Montréal, QC, Canada;*

15 *<sup>6</sup>Dept. of Obstetrics and Gynaecology, University of Washington, Seattle, WA, USA.*

16

17

18

19 **Running head:** Fetal microglia  $\alpha 7$ nAChR signaling

20

21

22

23 **Address of correspondence:**

24 Martin G. Frasch

25 Department of Obstetrics and Gynecology

26 University of Washington

27 1959 NE Pacific St

28 Box 356460

29 Seattle, WA 98195

30 Phone: +1-206-543-5892

31 Fax: +1-206-543-3915

32 Email: [mfrasch@uw.edu](mailto:mfrasch@uw.edu)

33

34

35 \* M. Cortes and M. Cao contributed equally to this manuscript

36

37

38 **Conflict of interest statement:** The authors have declared that no conflict of interest exists

39 **ABSTRACT**

40

41 Neuroinflammation *in utero* may result in life-long neurological disabilities. Microglia play a pivotal  
42 role, but the mechanisms are poorly understood. No early postnatal treatment strategies exist to enhance  
43 neuroprotective potential of microglia. We hypothesized that agonism on  $\alpha 7$  nicotinic acetylcholine  
44 receptor ( $\alpha 7$ nAChR) in fetal microglia will augment their neuroprotective transcriptome profile, while  
45 the antagonistic stimulation of  $\alpha 7$ nAChR will achieve the opposite. Using an *in vivo* - *in vitro* model of  
46 developmental programming of neuroinflammation induced by lipopolysaccharide (LPS), we validated  
47 this hypothesis in primary fetal sheep microglia cultures re-exposed to LPS in presence of a selective  
48  $\alpha 7$ nAChR agonist or antagonist. Our RNAseq and protein level findings show that a pro-inflammatory  
49 microglial phenotype acquired *in vitro* by LPS stimulation is reversed with  $\alpha 7$ nAChR agonistic  
50 stimulation. Conversely, antagonistic  $\alpha 7$ nAChR stimulation potentiates the pro-inflammatory microglial  
51 phenotype. Surprisingly, under conditions of LPS double-hit an interference of a postulated  $\alpha 7$ nAChR -  
52 ferroportin signaling pathway may impede this mechanism. These results suggest a therapeutic potential  
53 of  $\alpha 7$ nAChR agonists in early re-programming of microglia in neonates exposed to *in utero*  
54 inflammation via an endogenous cerebral cholinergic anti-inflammatory pathway. Future studies will  
55 assess the role of interactions between inflammation-triggered microglial iron sequestering and  
56  $\alpha 7$ nAChR signaling in neurodevelopment.

57

58 **WORD COUNT: 199**

59

60

61

62 **Funding:** Supported by grants from the Canadian Institute of Health Research (CIHR) (MGF); Fonds de  
63 la recherche en santé du Québec (FRSQ) (MGF) and Molly Towell Perinatal Research Foundation  
64 (MGF); QTNPR (by CIHR) (LDD).

## 65 INTRODUCTION

66 Brain injury acquired antenatally remains a major cause of long-term neurodevelopmental sequelae in  
67 children and adults.(1) Although the etiology of antenatal brain injury is undoubtedly multifactorial, there  
68 is growing evidence for a role for maternal and fetal infection and inflammation(2),(3),(4), which is  
69 supported by animal studies.(5),(2),(6) Both systemic and neuroinflammation have been implied as  
70 important pathophysiological mechanisms acting independently to cause fetal brain injury or contributing  
71 to *in utero* asphyxial brain injury with consequences for postnatal health.(7),(8)

72 The main cause of fetal inflammation, chorioamnionitis, is a frequent (10% of all pregnancies, up to 40%  
73 of preterm births) and often subclinical fetal inflammation associated with ~9fold increased risk for  
74 cerebral palsy spectrum disorders with life lasting neurological deficits and an increased risk for acute or  
75 life-long morbidity and mortality, inversely correlated with gestational age at delivery.(8),(9),(10)

76 In addition to short-term brain damage, recent studies suggest that neuroimmune responses to *in utero*  
77 infection may also have long-term health consequences. In adults, exposure to inflammatory stimuli can  
78 activate microglia (glial priming, reviewed in(11),(12)). Confronted with a renewed inflammatory  
79 stimulus, they can sustain chronic or exaggerated production of pro-inflammatory cytokines associated  
80 with postnatal neuroinflammatory diseases such as Multiple Sclerosis or sustained cognitive dysfunction  
81 (“second hit” hypothesis).(12),(13),(14)

82  $\alpha 7$  nicotinic acetylcholine receptor ( $\alpha 7$ nAChR) signaling in microglia may be involved in modulating  
83 TNF- $\alpha$  release to push microglia towards a neuroprotective role under conditions of lipopolysaccharide  
84 (LPS) exposure.(15),(16),(17)

85 We hypothesized that agonistic stimulation of  $\alpha 7$ nAChR in fetal microglia will augment their  
86 neuroprotective transcriptome profile, while the antagonistic stimulation of  $\alpha 7$ nAChR will achieve the  
87 opposite. Using a novel *in vivo* - *in vitro* model of developmental programming of neuroinflammation  
88 induced by LPS, we validate this hypothesis in primary fetal sheep microglia cultures exposed to LPS in  
89 presence of a selective  $\alpha 7$ nAChR agonist or antagonist.

90

## 91 RESULTS

92

### 93 *Primary fetal sheep microglia culture*

94

95 *In vitro* studies were conducted in primary cultures derived from six controls (naïve) and from two *in vivo*  
96 LPS-exposed animals (SH) in 1-2 *in vitro* replicates each animal depending on cell numbers obtained  
97 (Figure 1A). First, we investigated cytokine secretion properties of microglial cultures in the absence or  
98 presence of LPS. Methodology and results are presented elsewhere.(18) Second, we studied IL-1 $\beta$   
99 secretion profile (Figure 1B) in response to LPS accompanied by co-incubation with  $\alpha$ 7nAChR agonist  
100 AR-R17779 (NA or SHA) and the  $\alpha$ 7nAChR antagonist  $\alpha$ -Bungarotoxin (NB or SHB).

101

102 The cytokine IL-1 $\beta$  secretion profile showed a non-random distribution pattern ( $p < 0.001$ , main term  
103 “group”), but not for the main term “SH yes or no” ( $p = 0.122$ ). The latter main term identified each group  
104 as having or not having been exposed to an *in vivo* hit, *i.e.*, testing for the SH effect on IL-1 $\beta$  secretion  
105 profile without accounting for the experimental group. LPS exposure led to IL-1 $\beta$  rise ( $p = 0.020$ ) which  
106 was non-randomly changed by  $\alpha$ 7nAChR agonism ( $p < 0.001$ ), but not by antagonism ( $p = 0.801$ ).

107

108 The GEE model exploring the contribution of the second hit to the IL-1 $\beta$  secretion profile revealed a  
109 significant interaction between the four experimental groups (control, LPS, antagonist and agonist  
110 pre-treatments) and the presence or absence of two hits ( $p < 0.001$  for interaction term “group”\*“SH yes or  
111 no”). Specifically, without the preceding *in vivo* hit,  $\alpha$ 7nAChR agonism reduced the effect of this  
112 heightened IL-1 $\beta$  secretion ( $p = 0.028$ ). Surprisingly, with the preceding *in vivo* hit, *i.e.*, in the SH groups,  
113  $\alpha$ 7nAChR agonism amplified the effect ( $p = 0.028$ ). That is, *in vivo* exposure to LPS reversed the effect of  
114 the agonistic  $\alpha$ 7nAChR stimulation. Meanwhile, for  $\alpha$ 7nAChR antagonism the results were consistently  
115 supporting the initial hypothesis with IL-1 $\beta$  rising when accounting in the model for the preceding  
116 absence or presence of the *in vivo* first LPS hit (interaction terms “NB”\* “SH yes or no” ( $p = 0.048$ )). We  
117 found no significant interaction for NC and NL groups and SH ( $p = 0.204$ ).

118

### 119 *RNAseq approach*

120

#### 121 *Whole transcriptome analysis*

122 We reported the genomic landscape of primary fetal sheep microglia in response to LPS using similar  
123 quality control methods to confirm the cell culture purity.(18) Here we sequenced at high throughput the  
124 whole transcriptome of microglia exposed to LPS and pre-incubated with  $\alpha$ 7nAChR agonist or antagonist  
125 (Figure 1A). We performed a direct differential analysis of NA versus NB which eliminated the  
126 background noise of NC. This approach allowed us to observe the immediate effect of LPS on microglial  
127 transcriptome when it is modulated by  $\alpha$ 7nAChR antagonist versus agonist treatments. We performed 6  
128 differential analyses of microglia exposed to agonist and antagonist (NA, NB, respectively) versus control  
129 (NC) and second hit microglia exposed to antagonistic treatment (SHB). In Table 1, we summarized the  
130 number of differentially expressed genes (DEG) found for each differential analysis. Overall, the  
131 microglial transcriptome exposed to agonistic and antagonistic drugs revealed a greater amount of DEG  
132 than LPS-exposed microglia (latter results were published).(18)

133

#### 134 *Unique transcriptome signature of agonistic and antagonistic stimulation in microglia*

135 We identified 1,432 DEG ( $\text{padj} < 0.1$ ) up regulated genes in NB microglia compared to NL. We compared  
136 the population of DE up regulated genes in NB with those in NL microglia: 1,234 genes were unique to  
137 NB. The analysis of pathways with Topcluster revealed that unique genes to NB are members of the  
138 Jak-STAT, TNF- $\alpha$  and NF $\kappa$ B signaling pathways (Table 1, Figure 2A).

139 968 DE down regulated genes were identified in NB microglia compared to NL. All 53 genes previously  
140 identified in NL were also DE down regulated in NB. Thus, NB showed a unique signature of 915 genes.  
141 Gene ontology of genes unique to NB revealed that these genes are mostly part of coenzyme binding  
142 (GO:0050662 and  $P = 8.37 \times 10^{-6}$ ), GTPase regulator activity (GO:0030695 and  $P = 3.11 \times 10^{-5}$ ), damaged  
143 DNA binding activity (GO:0003684 and  $P = 2.59 \times 10^{-4}$ ) and H4 histone acetyltransferase activity  
144 (GO:0010485 and  $P = 9.42 \times 10^{-4}$ ).

145 We extracted genes that were uniquely differentially expressed in NB and not found in LPS-exposed naïve  
146 microglia (NL vs. NC). We reported up regulation of genes involved in the NF $\kappa$ B and JAK-STAT  
147 pathway. (18) A closer look at all genes involved in these two pathways confirmed up regulation of TNF  
148 and IL1B. However, in our previous results, the latter two were not differentially expressed under LPS  
149 exposure alone. Our current differential analysis of microglia treated with  $\alpha$ -Bungarotoxin prior to LPS  
150 exposure showed that both TNF and IL1B are differentially expressed and up regulated ( $\text{padj} = 1.17 \times$   
151  $10^{-25}$  and  $\text{padj} = 8.02 \times 10^{-88}$ , respectively), further confirming our hypothesis that antagonistic stimulation  
152 of  $\alpha$ 7nAChR potentiates LPS-triggered microglial inflammation (Figure 2A).

153 In a similar way, from both differential analyses to baseline NC, we extracted DE down regulated genes  
154 unique to NB and not found in NL. Here we found that HDAC10 and HDAC5 are uniquely DE down  
155 regulated in NB ( $\text{padj} = 8.81 \times 10^{-2}$ ,  $\text{padj} = 5.24 \times 10^{-6}$ , respectively). Further analysis of HDAC genes is  
156 described below (Figure 2B, Table 3).

157 When comparing NL to NA, we did not identify any DE down regulated genes. However, differential  
158 analysis of agonist-stimulated microglia rendered a unique signature compared to LPS-treated microglia.  
159 We found that two genes were DE up regulated in NA versus NL, ENSOARG00000020076 and  
160 HIST1H1T ( $\text{padj} = 1.01 \times 10^{-10}$ ,  $\text{padj} = 4.98 \times 10^{-2}$ , respectively). Per ensemble database, the gene  
161 ENSOARG00000020076 corresponds to the HIST1H2BI, a family member of the Histone cluster 1 H2B  
162 (Table 3, Figure 2C).

### 163 *Effect of $\alpha$ 7nAChR agonist and antagonistic drugs on microglial transcriptome*

164 Our main analysis focused on differences between NB and NA treatment. Our differential analysis of NA  
165 versus NB revealed 162 DEG, among which 24 were upregulated and 138 were down regulated (Table 1).  
166 Gene ontology of DEG down regulated in NA versus NB showed that DE down regulated were associated  
167 with the immune system (GO:0002376), however two DE up regulated genes also clustered for the GO  
168 terms immune system, HSPA6 and GADD45G (Figure 3B). In the human genome, the gene HSPA6 codes  
169 for the Heat shock 70 kDa protein 6, and GADD45G codes for Growth arrest and DNA damage-inducible  
170 protein GADD45 gamma.

171 Interestingly, we noticed that GO terms such as Locomotion (GO:0040011) and Reproduction  
172 (GO:0000003) were associated with DE down regulated genes (Figure 3A). We performed a second GO  
173 analysis with ToppGene of DEG down regulated, selected significant GO terms clusters ( $P < 10^{-3}$ ) and  
174 represented these in a bar chart with  $-\text{Log}(P)$  (Figure 4). Among DEG down regulated, the immune  
175 response was strongly significant ( $P = 6.10 \times 10^{-15}$ ); we also noticed leukocyte migration and  
176 inflammatory response among the GO terms clustering (Figure 4, Table 3).

177 Lending support to our hypothesis, these results confirmed the anti-inflammatory effect of the  $\alpha$ 7nAChR  
178 agonistic stimulation on microglia.

### 179 *Modulation of the memory of inflammation by $\alpha$ 7nAChR signaling*

180 From two differential analyses, NB versus NC and SHB versus NB, we selected up and down regulated  
181 genes with  $\text{Log}_2 > |2|$  and represented common genes into a Venn diagram (Figure 5A). A total of 7 genes

182 were DE and up regulated in both analyses, and two genes were down regulated. Interestingly, common  
183 down regulated genes were HMOX1 and SLC40A1.

184 We reported the potential role of heme-oxygenase 1 (HMOX1) during neuroinflammation and will focus  
185 here on the gene SLC40A1 (ferroportin).(18) Using a double-hit model of LPS exposure, we showed that  
186 microglia gained memory of inflammation when pre-exposed to LPS *in vivo*, and we also pin-pointed the  
187 role of iron metabolism in this process. Here, gene ontology of uniquely down regulated genes in SHB  
188 versus NB contained, among pathways affected, metal ions compound ( $P = 4.64 \times 10^{-9}$ ) and  
189 SLC-mediated transmembrane transport ( $P = 3.49 \times 10^{-10}$ ). Similar to our earlier results with HMOX1  
190 (18), this finding now highlights the putative role of SLC genes, another key component of the iron  
191 homeostasis in neuroinflammation, when cholinergic signaling is perturbed (Figure 5B).

192 Hepcidin (HAMP) plays a key role in linking inflammation and iron homeostasis (19), therefore we  
193 examined the RNA transcript level changes of hepcidin and ferroportin in our  $\alpha 7nAChR$  signaling model.  
194 Differential analyses of NL and NB to baseline and NA vs. NB revealed an opposite pattern of expression  
195 of HAMP and SLC40A1 in agonist-treated microglia, wherein ferroportin was up regulated ( $\text{Log}_2 = 0.49$ )  
196 and hepcidin was down regulated ( $\text{Log}_2 = -1.31$ ). However, only ferroportin was differentially expressed  
197 in naïve microglia and bungarotoxin-treated microglia ( $\text{padj} = 9.79 \times 10^{-4}$ ,  $\text{padj} = 4.26 \times 10^{-5}$ ,  
198 respectively). Further validation will be necessary to confirm these results (Figure 6).

199  
200 Similar to our findings on naïve microglia(18) and lending support to the epigenetic mechanisms of such  
201 neuroinflammation memory, here we also found HDAC1 up regulation following LPS exposure to be  
202 potentiated by pre-treatment with  $\alpha 7nAChR$  antagonist (NC-NB). This supports the notion that blocking  
203  $\alpha 7nAChR$  signaling has pro-inflammatory effects not only on the level of cytokine secretion, but also on  
204 the level of strengthening the inflammation memory. HDAC6 behaved in the opposite direction of  
205 HDAC1, again similar to what we reported for LPS alone and potentiated by the  $\alpha 7nAChR$  antagonism  
206 (Table 3).  
207



## 208 DISCUSSION

209 In a unique double hit model of fetal neuroinflammation in a large mammalian brain, we studied  
210 transcriptomic changes following modulation of cholinergic signaling through  $\alpha 7$ nAChR with selective  
211 antagonistic drug  $\alpha$ -Bungarotoxin and agonistic drug AR-R17779. We previously reported the activation  
212 of major inflammatory pathways JAK-STAT and NF $\kappa$ B in naïve microglia exposed to LPS as an  
213 inflammatory stimulus.(18) In our current analysis, we demonstrated the enhanced activation of these  
214 inflammatory pathways in microglia exposed to LPS and pre-treated with  $\alpha$ -Bungarotoxin. Both,  
215 transcriptomic activation and protein level IL-1 $\beta$  secretion patterns were enhanced in  $\alpha$ -Bungarotoxin  
216 pre-treated microglia compared to microglia exposed to LPS alone. Our findings extend the *in vitro*  
217 observations in mature rodent primary microglia cultures to a large mammalian developing brain exposed  
218 to LPS *in vivo* and *in vitro*.(15)

219 We aimed to understand biological processes in microglia when exposed to AR-R17779. The key finding  
220 from the differential analysis of NA versus NB was that genes of the immune response were DE down  
221 regulated in NA and most of these genes were up regulated in LPS-treated microglia (data not shown).  
222 Notably, JAK3 was DE down regulated in NA, and C-FOS was up regulated. DEG up regulated in NA and  
223 clustering in the immune system process GO term comprised only HSPA6 and GADD45G. The latter is  
224 known to regulate cytokine expression during LPS-induced inflammation (20), whereas HSPA6 is only  
225 induced under severe oxidative stress.(21) Lending support to our hypothesis, our findings in NA versus  
226 NB comparisons confirmed the anti-inflammatory effect of the  $\alpha 7$ nAChR agonistic stimulation in  
227 microglia.

228 The current findings represent the first direct *in vitro* validation of our earlier indirect *in vivo* observations  
229 in the fetal sheep brain of the same gestational age when we proposed the existence of a fetal cerebral  
230 cholinergic anti-inflammatory pathway with *in situ* evidence of the expression of  $\alpha 7$ nAChR on  
231 microglia.(22)

### 232 233 *Effect of $\alpha 7$ nAChR signaling on the FBP / HMOX1 microglial phenotype*

234 We reported HMOX1<sub>down</sub> / FBP<sup>up</sup> transcriptome phenotype in SHL microglia.(18) We expected that the  
235 agonistic stimulation of  $\alpha 7$ nAChR would attenuate this phenotype. HMOX1 and FBP were both  
236 differentially expressed in SHL microglia and this phenotype was sustained with antagonistic treatment.  
237 Differential expression in naïve microglia NA and NB did reveal an opposite expression, wherein  
238 HMOX1 was up regulated and FBP was down regulated in NA, however a statistically significant  
239 differential expression was not observed. Thus, further studies are needed to validate these results in the  
240 SHL microglia stimulated agonistically on the  $\alpha 7$ nAChR (cf. Methodological considerations).

### 241 242 *$\alpha 7$ nAChR signaling modulates the epigenetic memory of inflammation in fetal microglia*

243 Our findings suggest a potential role of histones in the memory of neuroinflammation.(18) Here, we asked  
244 whether epigenetic mechanisms are involved in enhancement and reduction of neuroinflammation in  
245 microglia via  $\alpha 7$ nAChR signaling. Differential analysis of NA versus NL revealed two DEG up regulated,  
246 HIST1H2BI and HIST1H1T, both corresponding to histone cluster 1H, strengthening our hypothesis of  
247 memory of neuroinflammation sustained by epigenetic factors(18) and extending it to involve  $\alpha 7$ nAChR  
248 signaling.

249 Our previous report showed that HDAC1, HDAC2 and HDAC6 were potentially involved in the memory  
250 of neuroinflammation. In this study, among selected HDAC genes DE in NB compared to NC, all showed  
251 an opposite expression pattern in NA compared to NB. The gene HAT1 was also DE down regulated in  
252 our previous report and was up regulated in the agonistically-treated microglia. Of note, similar to our  
253 published findings on naïve microglia, here we also found HDAC1 up regulation following LPS exposure  
254 and this effect was further potentiated by pre-treatment with  $\alpha 7$ nAChR antagonist (NC-NB) supporting

255 the notion that blocking  $\alpha 7$ nAChR signaling has pro-inflammatory effects not only on the level of  
256 cytokine secretion, but also on the epigenetic level by strengthening the inflammation memory.

257

258 *Microglial iron homeostasis is modulated by  $\alpha 7$ nAChR signaling: implications for neurodevelopment*

259 To further address mechanisms involved in memory of inflammation, we extracted common DE genes  
260 between naive and second hit microglia treated with  $\alpha$ -Bungarotoxin. Common DEG up regulated  
261 included the genes CCL17, CYP3A and DNMT3L. CCL17 is known to mediate inflammation through  
262 macrophages (23), while CYP3A (cytochrome P450 3A) plays a major role in drug metabolism. CYP3A  
263 function in microglia is not known. Previous reports cited the up regulation of DNMT3L in TLR3- and  
264 TLR4 stimulated microglia (24), concordant with our results in  $\alpha$ -Bungarotoxin treated microglia. We  
265 identified two DEG down regulated genes SLC40A1 and HMOX1. In conjunction with published results  
266 on HMOX1, we aimed to understand the role of SLC40A1, an iron-regulated transporter, known as  
267 ferroportin.

268 Our data indicate a combination of down regulation of metal ion transporter, ferroportin, with HMOX1.  
269 Ferroportin acts as a receptor for hepcidin (HAMP).(25) Hepcidin production is increased during the  
270 inflammatory response with increased binding of hepcidin to ferroportin leading to the internalization and  
271 degradation of ferroportin. This mechanism consequently suppresses enteral iron absorption and cellular  
272 iron release, whereas a decrease in hepcidin promotes iron uptake. Our results in fetal microglia are  
273 concordant with these published data in non-brain cells. Indeed, in naïve microglia (NL) compared to  
274 baseline (NC), HAMP was up regulated during inflammation and SLC40A1 was down regulated. This  
275 expression pattern was reversed in  $\alpha 7$ nAChR agonist-treated (NA) compared to antagonist-treated  
276 microglia (NB). Our results suggest that in microglia, during inflammation, iron uptake is not only  
277 regulated by hepcidin binding to ferroportin but also by the level of transcription of ferroportin under  
278 cholinergic control.

279 Further studies are needed to clarify the role of hepcidin and heme-oxygenase during neuroinflammation  
280 and in memory of neuroinflammation. Such studies will help elucidate the mechanism underlying  
281 memory of neuroinflammation acquired *in utero* and the neurodevelopmental sequelae.

282 Evidence is emerging that iron overload is intricately involved in cognitive dysfunction with microglia  
283 priming or activation playing a key role in this process.(26-28) Excess intracellular iron may result from  
284 postoperative inflammation mediated by hepcidin or age-related iron accumulation under conditions of  
285 chronic inflammation. While most work in this area has been done in cultures or rat animal models, to our  
286 knowledge, this is the first report of inflammation-triggered changes in iron homeostasis in a larger  
287 mammalian brain with high resemblance to human physiology and in patterns of response to injury. We  
288 believe the current report is also the first observation of the putative link between cholinergic signaling in  
289 fetal microglia and the inflammatory milieu. Remarkably, iron homeostasis genes turn out to be key in  
290 determining the phenotype of the double-hit microglia. In light of the known role of iron in cognitive  
291 function (and dysfunction), our results raise the possibility that early disturbances in iron metabolism may  
292 have profound consequences in fetal and postnatal brain development. Our findings also suggest a  
293 possible therapeutic venue to modulate intracellular iron load via the  $\alpha 7$ nAChR.

294

295 *Impact of  $\alpha 7$ nAChR signaling manipulation on complement signaling pathway: putative implications for*  
296 *early programming of susceptibility to Alzheimer's disease*

297 Cognitive dysfunction may result not only from iron overload, but also from derangements in the  
298 neuronal-glia complement pathway interactions. Hyperactive microglia may prevent physiological  
299 synaptogenesis predisposing to Alzheimer's disease (AD) later in life.(29),(30) The mediating pathway  
300 involves microglial-neuronal complement signaling suggesting that microglia could be potential early  
301 therapeutic targets in AD prevention or treatment and in other neurodegenerative diseases. The



302 complement genes C1Q and CR3 (also known as CD11B) were involved in the microglia-mediated  
303 synaptic loss in a mouse model of AD.(29) Less is known about the function of the complement receptor 2  
304 (CR2, also known as CD21) in neuroinflammation, especially in microglia. One study reports CR2<sup>-/-</sup> mice  
305 to be more prone to neuronal injury with higher levels of astrogliosis following nerve root cord injury.  
306 This would suggest a neuroprotective role for CR2(31). Another study reports CR2<sup>-/-</sup> mice subjected to  
307 traumatic brain injury to exhibit less astrogliosis and less microglial activation which would suggest the  
308 opposite role for CR2. (32) In mice, CR1 and CR2 are coded on the same gene and expressed as splice  
309 variants. In sheep, however, and other higher mammals these complement genes are coded separately.  
310 Hence, more studies are needed to gauge the functional role of CR2 in neuroinflammation, microglia in  
311 particular, especially with respect to human neurodegenerative diseases such as AD. Consequently, we  
312 conducted a secondary analysis of DEG in SHB compared to NB for CR2, C1Q chain A and B (C1QA,  
313 C1AB, respectively) and Complement component 3A Receptor 1 (C3AR1) as the best equivalent of CR3  
314 in the annotated genome (Table 4). C3AR1 was the only gene showing a clear opposite pattern between  
315 agonistic and antagonistic  $\alpha 7$ nAChR treated microglia. Specifically, we found that agonistic stimulation  
316 of  $\alpha 7$ nAChR up regulated C3AR1 compared to antagonistic stimulation. We believe these findings  
317 deserve further study because pro-cholinergic drugs are used to treat AD symptoms, but the consequences  
318 of cholinergic stimulation on microglial signaling are not well understood. Our results suggest that  
319 blocking rather than enhancing  $\alpha 7$ nAChR signaling in microglia may be beneficial to help slow down  
320 synaptic degradation.

321  
322 *Mechanistic model of interactions between iron homeostasis and  $\alpha 7$ nAChR signaling pathways in*  
323 *microglia*

324 Based on our findings and the supporting literature, we propose a model of interactions between iron  
325 homeostasis and  $\alpha 7$ nAChR signaling in microglia (Fig. 7). The model highlights in red three exogenous  
326 factors that may be driving the microglial phenotype, some more intuitive (inflammation) than others (iron  
327 and stress). We briefly outline below the mechanistic connections to the “non-intuitive” factors and refer  
328 the interested reader to the cited references for details.

329 Iron deficiency is the most common form of nutrient deficiency worldwide. According to the World  
330 Health Organization, it affects nearly 2 billion people and up to 50% of women who are pregnant.(33) At  
331 birth, 25-85% of premature babies are iron deficient and all will become iron deficient after birth, if not  
332 adequately supplemented, especially in developing countries.(34) Iron is essential for neonatal and  
333 long-term cognitive and physical development.(35),(36) Fetal or early postnatal inflammation may result  
334 in hepcidin-mediated intracellular microglial iron sequestration which may polarize microglia toward an  
335 inflammatory phenotype. We suggest a yet to be validated signaling pathway between the  $\alpha 7$ nAChR  
336 signaling cascade and the hepcidin-ferroportin steady-state. Such pathway may counteract to a degree  
337 hepcidin’s inhibitory effect on iron release due to the ferroportin internalization and degradation. We  
338 propose that such pathway is bidirectional with modulatory effects of hepcidin-ferroportin signaling on  
339  $\alpha 7$ nAChR signaling. The bidirectional aspect is supported by our surprising observation of the IL-1 $\beta$   
340 secretion profile in the SHA group. *In utero* inflammation may reprogram microglial iron homeostasis  
341 toward iron sequestration which in turn diminishes the anti-inflammatory effect of the  $\alpha 7$ nAChR  
342 signaling. At second hit, the resulting net effect on the expression of pro-inflammatory cytokines  
343 controlled by NF- $\kappa$ B via the putative  $\alpha 7$ nAChR - ferroportin – hepcidin signaling network becomes  
344 pro-inflammatory which would explain the surprising switch of the IL-1 $\beta$  secretion profile in the SHA  
345 group compared to NA group. This is further supported by the finding that only accounting for *in utero*  
346 inflammation (first hit) revealed the SHB effect.

347 The second major factor is the actual availability of  $\alpha 7$ nAChR agonists to drive this pathway. One obvious  
348 candidate is the afferent cholinergic anti-inflammatory pathway via the vagus nerve that is comprised to  
349 ~80% of afferent fibers and has wide-ranging projections in the brain.(37),(22),(38),(39) Another very

350 well researched knob controlling ACh availability in the brain, independent of the vagal cholinergic  
351 signaling pathway, is the acetylcholinesterase (AChE). AChE is a key enzyme that regulates the ACh  
352 levels.(40) ACh binds to immune system cells such as microglia in the brain and macrophages in the  
353 periphery and decreases their propensity to respond to inflammatory stimuli during healthy (homeostatic)  
354 and infectious states (*e.g.*, bacterial sepsis).(41),(42) Under stress, elevated cortisol levels alter AChE  
355 gene expression to induce over-production of AChE and replace the major stable AChE splice variant  
356 AChE-S by the less stable AChE-R variant.(43, 44) Increased levels of AChE-R have been shown to result  
357 in chronic inflammation that ultimately impedes the body's ability to defend itself against acute  
358 infections.(45, 46) AChE-S and -R ratios may influence ACh availability for the microglial  $\alpha 7$ nAChR  
359 signaling. The dependence on stress is particularly intriguing and relevant for neurodevelopment in the  
360 context of fetal microglial physiology, because stress during pregnancy is a very common phenomenon  
361 with estimates ranging from conservative 10% to as high as 50% of all pregnant women to report at least  
362 one major stress event during pregnancy.(47),(48, 49)

363

#### 364 *Methodological considerations*

365 Aside from the lack of biological replicates for SHL microglia, we conducted differential analyses in all  
366 other samples. The lack of SHA replicates for sequencing prevented us from studying directly the effect of  
367 agonistic drugs on SHL microglia. Thus, further study is needed on the transcriptomic level in  $\alpha 7$ nAChR  
368 agonistic stimulated SHL microglia.

369

## 370 METHODS

371

### 372 *In vitro* microglia culture protocol

373 Fetal sheep brain tissues were obtained during sheep autopsy after completion of the experiment for *in*  
374 *vitro* study. The non-instrumented, untreated twins were designated “naïve” (no LPS exposure *in vivo*).  
375 Instrumented animals that received LPS *in vivo* were used for 2<sup>nd</sup> hit LPS exposure *in vitro*. Fetal sheep  
376 microglia culture protocol was adapted from an established human adult and fetal microglia culture  
377 protocol that was modified to include a myelin removal step following high-speed centrifugation.(50)  
378 Briefly, fetal sheep cells were plated on poly-L-lysine (PLL)-coated tissue culture flasks at a concentration  
379 of  $2 \times 10^6$  cells /ml in DMEM with 5% heat-inactivated fetal bovine serum (Gibco, Canada Origin), 1%  
380 penicillin/ streptomycin, and 1% glutamine (5% DMEM), in which microglia are preferable to grow.(50)  
381 Cells were allowed to incubate for seven days at 37°C, 5% CO<sub>2</sub>, followed by media change by  
382 centrifugation and addition of re-suspended cells back to the culture flask. Cells were continued to  
383 incubate for seven more days with 5% DMEM at 37°C, 5% CO<sub>2</sub>, before floating cells were collected.  
384 Carefully collecting the floating microglia to avoid contamination with astrocytes and oligodendrocytes,  
385 the cells were incubated in 24-well plate at  $1 \times 10^5$  cells/mL with 5% DMEM for another 4-5 days, and  
386 then treated with or w/o LPS (100ng/ml, Sigma L5024, from E coli O127, B8)) for 6h. Cell conditioned  
387 media were collected for cytokine analysis, 0.5ml TriZol were added per well for RNA extraction.  
388 To verify microglia purity, a portion of floating cells were cultured in 24-well plate at above conditions for  
389 flow cytometry analysis (see below), cell morphology was documented with light microscopy. Another  
390 portion of floating cells were plated into Lab-Tek 8 well chamber glass slide (Thermo Scientific) and  
391 treated with or w/o LPS for immunocytochemistry analysis, in this experiment, some wells of astrocytes  
392 cultured at DMEM with 10% FCS were included for comparison.

393

### 394 Cell culture

395

396 Microglia cells isolation and culture were described in detail elsewhere.(18) Briefly, prior to exposure to  
397 LPS, cells were pre-treated for 1 hour with either 10nM AR-R17779 hydrochloride (Tocris Bioscience  
398 Cat# 3964), a selective  $\alpha 7$ nAChR agonist, or 100nM  $\alpha$ -Bungarotoxin (Tocris Bioscience Cat# 2133), a  
399 selective  $\alpha 7$ nAChR antagonist. Optimal dose of AR-R17779 (A) or  $\alpha$ -Bungarotoxin (B) was chosen based  
400 on a dose-response experiment with LPS; AR-R17779 hydrochloride was dissolved in DMSO into a stock  
401 solution. We then made serial dilutions, whereas  $\alpha$ -Bungarotoxin was reconstituted with culture media  
402 into a stock solution and underwent serial dilutions. AR-R17779 and  $\alpha$ -Bungarotoxin preparations were  
403 added well by well; the same volume of vehicle (either DMSO or cell culture media) was added in control  
404 wells. Therefore, in a complete cell culture experiment, we had four experimental groups: Control, LPS,  
405 LPS+B and LPS +A. Second hit cell cultures were designed with the same pattern and divided into four  
406 experimental groups: Control (SHC), LPS (SHL), LPS+B (SHB) and LPS+A (SHA).

407

### 408 Measurements of inflammatory responses

#### 409 *Measurement of cytokines in plasma and cell culture media*

410 Cytokine concentrations in cell culture media (IL-1 $\beta$ ) were determined by using an ovine-specific  
411 sandwich ELISA. Briefly, 96-well plates (Nunc Maxisorp, high capacity microtitre wells) were  
412 pre-coated with the capture antibody, the mouse anti sheep monoclonal antibodies (IL-1 $\beta$ , MCA1658, Bio  
413 Rad AbD Serotec) at a concentration 4 $\mu$ g/ml on ELISA plate at 4°C for overnight, after 3 times wash with  
414 washing buffer (0.05% Tween 20 in PBS, PBST), plates were then blocked for 1h with 1% BSA in PBST  
415 for plasma samples or 10% FBS for cell culture media. Recombinant sheep proteins (IL-1  $\beta$ , Protein  
416 Express Cat. no 968-405) were used as ELISA standard. All standards and samples (50 $\mu$ l per well) were  
417 run in duplicate. Rabbit anti sheep polyclonal antibodies (detection antibody IL-1 $\beta$ , AHP423, Bio Rad  
418 AbD Serotec) at a concentration of 4 $\mu$ g/ml were applied in wells and incubated for 30min at room

419 temperature. Plates were washed with washing buffer for 5-7 times between each step. Detection was  
420 accomplished by assessing the conjugated enzyme activity (goat anti-rabbit IgG-HRP, dilution 1:5000,  
421 Jackson ImmunoResearch, Cat. No 111-035-144) via incubation with TMB substrate solution (BD  
422 OptEIA TMB substrate Reagent Set, BD Biosciences Cat. No 555214), colour development reaction was  
423 stopped with 2N sulphuric acid. Plates were read on ELISA plate reader at 450nm, with 570nm  
424 wavelength correction (EnVision 2104 Multilabel Reader, Perkin Elmer). The sensitivity of IL-1 $\beta$  ELISA  
425 for media was 41.3 pg/ml. For all assays, the intra-assay and inter-assay coefficients of variance was <5%  
426 and <10%, respectively.

427

#### 428 *RNAseq approach*

429 The overall experimental design was divided into three phases: sequencing, quantification and discovery  
430 (Figure 1A). RNA extraction and RNA quantification: Total RNA was extracted from cultured microglia  
431 using TRIzol Reagent (Life Technologies), to obtain enough amount RNA, same treatment cells maybe  
432 pooled in same replicates. RNA quantity and quality (RNA integrity number, RIN) was established by  
433 using a RNA Nano Chips (Agilent RNA 6000 Nano Chips) with Agilent 2100 BioAnalyzer. All samples  
434 had acceptable RIN value ranging from 6 to 8.5 A total of 12 naïve microglia cultures from four sets of  
435 replicates were selected for RNA sequencing at high throughput, as well as three second hit microglia  
436 cultures, including SHC, SHL and antagonist-exposed microglia (SHB). Second hit microglia further  
437 exposed to agonistic drugs (SHA) were not sequenced due to low RIN. This is left for future studies.

438

439 RNAseq libraries were prepared by using Illumina TruSeq RNA Sample Preparation v2 kit (Illumina) and  
440 quality control was performed on the BioAnalyzer. Single-end 50-bp sequencing was performed at high  
441 throughput on an Illumina HiSeq2500 at the CHU Ste-Justine Core Facility Sequencing Platform.

442

#### 443 *RNAseq data analysis*

444 **Reads alignment to the reference genome.** To maximize the number of genes covered, raw data were  
445 mapped to the reference genome of the sheep *Ovis aris* v3.1 from NCBI and Ensembl  
446 (GCA\_000298735.1) as transcriptome reference. Index of the reference fasta file were built with  
447 Bowtie2(51), we then trimmed the adaptor of the fastQ files with TrimGalore, and mapped reads to the  
448 reference with Tophat2.(52) From the aligned reads from Tophat2, the number of reads per gene were  
449 counted with HTseq and assembled into a matrix containing the read count of each gene per sample.(53)

450 **Normalization and transcriptome analysis.** In order to find differentially expressed genes we used  
451 DESeq2 to normalize the dataset, generate Log<sub>2</sub>-fold changes and adjacent P values (padj).(54) We  
452 performed 6 differential analyses of microglial transcriptome (Table 1). After stimulation through  
453  $\alpha$ 7nAChR with agonistic and antagonistic drugs, we aimed to measure changes at the transcriptome level.  
454 Thus, we eliminated the background carried by exposure to LPS by comparing directly NA read count  
455 variation to NB. Due to the lack of replicates in our second-hit experiment, we were unable to perform  
456 thorough differential analysis of second hit microglial cells and leave the second hit transcriptome  
457 analysis for future studies. A gene was considered differentially expressed if its adjacent p-value was  
458 strictly lower than 0.1. Pools of up and down regulated genes and differentially expressed genes were  
459 clustered and visualized into heat maps, generated in R using the log<sub>2</sub> normalized counts and the  
460 heatmap.2 method of the gplots library.(55)

461 **Gene selection and Gene Ontology (GO).** The sheep genome is not yet supported by most gene ontology  
462 platforms; therefore, downstream analyses were performed with orthologs in the human genome *Homo*  
463 *sapiens*. To select relevant genes among up regulated and down regulated genes, we performed gene  
464 enrichment analysis for biological process and molecular function with ToppGenes and FDR < 0.05.(56,  
465 57) Bar diagram of significant GO terms (P < 10<sup>-3</sup>) was presented on a -Log (P) scale. Protein-protein  
466 interaction networks were generated with the STRING database and disconnected nodes were not

467 represented.(58) Gene Ontology was also performed in parallel with PantherDB and only biological  
468 processes were presented in pie charts.(59)

469

#### 470 *STATISTICS*

471 Generalized estimating equations (GEE) modeling approach was used to assess the effects of LPS and  
472 drug treatments. We used a linear scale response model with LPS/drug treatment group and presence or  
473 absence of second hit exposure as predicting factors to assess their interactions using maximum likelihood  
474 estimate and Type III analysis with Wald Chi-square statistics. SPSS Version 21 was used for these  
475 analyses (IBM SPSS Statistics, IBM Corporation, Armonk, NY). Significance was assumed for  $p < 0.05$ .  
476 Results are provided as means  $\pm$  SEM or as median {25-75} percentile, as appropriate. Not all  
477 measurements were obtained for each animal studied.

478

#### 479 *Study approval*

480 This study was carried out in strict accordance with the recommendations in the Guide for the Care and  
481 Use of Laboratory Animals of the National Institutes of Health. The respective *in vivo* and *in vitro*  
482 protocols were approved by the Committee on the Ethics of Animal Experiments of the Université de  
483 Montréal (Permit Number: 10-Rech-1560).

484



485 **AUTHOR CONTRIBUTIONS**

486

487 CSM, PB, GF, AD, JPA and MGF are responsible for the conception and design.

488 MCo, HLL, CSM, LDD, PB, GF, and AD acquired data.

489 MCo, MCo, HLL, CSM, LBB, JPA and MGF did the analysis and interpretation of data.

490 MCo, MCo and MGF drafted the manuscript.

491 MCo, MCo and MGF are responsible for revising it for intellectual content.

492 MCo, MCo, HLL, CSM, LDD, PB, GF, AD, LBB, JPA and MGF gave final approval of the completed  
493 manuscript.

494

495 **ACKNOWLEDGEMENTS**

496 The authors thank Dora Siontas, Manon Blain for cell culture and ICC, Lamia Naouel Hachehouche for  
497 cytokines ELISA assay, Vania Yotova for RNAseq library preparation, Jean-Christopher Grenier for  
498 alignment to the reference genome and read count, St-Hyacinthe CHUV team and M. Michel-Robinson  
499 for technical assistance and Jan Hamanishi for graphical design.

500

## 501 **Figure legends**

502

503 **Figure 1. Experimental design of modulation through  $\alpha 7$ nAChR signaling in a double-hit fetal**  
504 **sheep model. A.** *In vivo*, *in vitro* and RNAseq experiments are illustrated. *In vivo* study, Control (saline);  
505 *in vitro* study, cultured cells derived from *in vivo* Control animal, named as Naïve, there are 8  
506 experimental groups: naïve Control (NC), naïve LPS (NL), naïve exposed to  $\alpha$ -Bungarotoxin (NB), naïve  
507 exposed to AR-R17779 (NA), and each respective second-hit groups (SH). For RNAseq data  
508 comparisons, the group SHA was excluded. **B.** Box plot graph of cytokine IL-1 $\beta$  response obtained for  
509 each group of replicates. \* represents an outlier outside 95<sup>th</sup> percentile. GEE model results are presented in  
510 text and no significance marks are provided in the figure. Briefly, we found significant main and  
511 interaction term effects ( $p < 0.05$ ) for LPS and drug treatment and the contribution of *in vivo* LPS exposure,  
512 *i.e.*, SH effect on IL-1 $\beta$  secretion profile.

513

514 **Figure 2. Stimulation of  $\alpha 7$ nAChR enhances the anti-inflammatory properties of fetal microglia.**  
515 Differential analysis of the transcriptome of microglia pre-treated with the  $\alpha 7$ nAChR antagonist  
516  $\alpha$ -Bungarotoxin (NB) and the  $\alpha 7$ nAChR agonist AR-R17779 (NA) compared to controls (NC) and  
517 compared to the *in vitro* LPS-treated microglia whose  $\alpha 7$ nAChR activity was not modulated (NL). The  
518 Venn diagrams represent the number of unique genes for each group, and in the middle, the number of  
519 common genes. Selected genes of interest are written on the right side of each heat map. **A.** Microglia  
520 treated with the  $\alpha 7$ nAChR antagonist  $\alpha$ -Bungarotoxin recruited more genes involved in the inflammatory  
521 pathway. **B.**  $\alpha$ -Bungarotoxin also increased the response in DE down regulated genes. **C.** NL and NA  
522 microglia revealed two DE up regulated histone genes.

523

524 **Figure 3. Differentially expressed genes (DEG,  $p_{adj} < 0.1$ ) in agonist (NA) compared to**  
525 **antagonist-preincubated LPS-exposed naïve microglia (NB).** **A.** Heat map representation of  
526 differentially expressed down regulated genes and gene ontology pie chart. **B.** Heat map of up regulated  
527 genes in NA, compared to NB. Gene Ontology of each set of DEGs was presented as a pie chart at the  
528 bottom of each corresponding heat map. Note that “Immune system” and “Metabolic process” are both  
529 strongly down and up regulated, possibly referring to different functions being turned off while others are  
530 turned on under the influence of cholinergic signaling through  $\alpha 7$ nAChR.

531

532 **Figure. 4. Gene ontology analysis with ToppGene of selected DEGs in agonist (NA) compared to**  
533 **antagonist-preincubated LPS-exposed naïve microglia (NB).** Bar graph of 138 DEG down regulated.  
534 Each selected GO term ( $P < 10^{-3}$ ) was represented on a  $-\log(P)$  scale.

535

536 **Figure 5. Stimulation with  $\alpha$ -Bungarotoxin shows a unique transcriptome profile in microglia. A.**  
537 **Uniquely DEG in SHB ( $p_{adj} < 0.01$ ,  $\log_2 > |2|$ ).** Each set of the common DEGs is written at the bottom of  
538 the Venn diagram. **B.** Pathways revealed by Gene Ontology of uniquely differentially expressed down  
539 regulated genes in SHB; pathways are represented with their  $-\log(P)$ .

540

541 **Figure 6. Genetic expression variation of SLC40A1 and HAMP through  $\alpha 7$ nAChR signaling.** Each  
542 differential analysis is noted on the x-axis. The gene SLC40A1 is coding for the protein Ferroportin-1, a  
543 transmembrane protein, transporter of iron molecules into the bloodstream. Ferroportin-1 and HAMP  
544 have both an opposite pattern in agonist-treated microglia compared to naïve LPS-exposed microglia.

545

546 **Figure 7. A model of interactions between iron homeostasis and  $\alpha 7$ nAChR signaling in microglia.**  
547 Highlighted in red are the three exogenous factors that may be driving the microglial phenotype:  
548 inflammation, iron and stress. The former two stimulate hepcidin which in turn acts on ferroportin to be  
549 internalized and degraded. This reduces extracellular iron (sensed as Fe-TF, heme transferrin by TFR2,

550 transferrin receptor 2 [shown here simplified as the representative iron sensor receptor] and increases the  
551 intracellular iron, a process referred to as iron sequestration. We propose that ferroportin's membrane  
552 localization appears to also be controlled by the  $\alpha 7$ nAChR signaling (blue arrow).  $\alpha 7$ nAChR signaling  
553 depends on the acetyl choline (ACh) availability. The latter depends on the afferent vagus nerve  
554 cholinergic signaling in the brain via a distributed network as well as the non-vagal sources of ACh  
555 controlled by ACh esterase (AChE) activity and the availability of dietary choline. Remarkably, a large  
556 body of research has shown that AChE activity depends on chronic stress levels, a factor highly relevant in  
557 fetal microglia context in particular, because stress is very common in pregnancy. Stress results in shifts of  
558 the post-translational modification of AChE from AChE-S splice variant (healthy) to the less stable  
559 AChE-R variant.  
560

561 **Table 1. Differential analysis summary in naïve and second hit microglia after modulation of**  
562  **$\alpha 7$ nAChR signaling.** Differential analysis of count data was done with the DESeq2 package. Differential  
563 expressed genes were selected for  $\text{padj} < 0.1$ . Up regulation and down regulation represent positive and  
564 negative Log2 fold changes, respectively.

565  
566 **Table 2. Genetic expression of HMOX1 and FBP after exposure to LPS and signaling through**  
567  **$\alpha 7$ nAChR.** Confirming our previous findings and the notion of the pro-inflammatory effect of blocking  
568 signaling through  $\alpha 7$ nAChR, we found HMOX1 to be progressively stronger down regulated and FBP up  
569 regulated due to a double-hit LPS exposure and subsequent pre-treatment with the receptor antagonist  
570 (SHB).

571  
572 **Table 3. Impact of  $\alpha 7$ nAChR signaling on memory of inflammation.** Differential analysis of HDACs  
573 and HATs genes, DEG are indicated with a **bold** font ( $\text{padj} < 0.1$ ). In our previous report, we highlighted  
574 the potential role of HDAC1, 2 and 6 in memory of inflammation in fetal microglia.

575  
576 **Table 4.  $\alpha 7$ nAChR signaling modulates the patterns of the complement C1Q-C3AR1 network**  
577 **activity implicated into microglial-neuronal interactions and pruning.** Antagonistic stimulation of the  
578 microglial  $\alpha 7$ nAChR, but not the agonistic stimulation, down regulates both C1Q and C3AR1 expressions  
579 while up regulating C2. This is important to study further because pro-cholinergic drugs are used to treat  
580 AD symptoms, but it seems that at least in microglial  $\alpha 7$ nAChR signaling the opposite effect, blocking the  
581 cholinergic signaling, may be beneficial to help slow down synaptic degradation.

582



583 **REFERENCES**

- 584
- 585 1. Saigal S, and Doyle LW. An overview of mortality and sequelae of preterm birth from infancy to adulthood. *Lancet*.  
586 2008;371(9608):261-9.
- 587 2. Rees S, and Inder T. Fetal and neonatal origins of altered brain development. *Early human development*.  
588 2005;81(9):753-61.
- 589 3. Murthy V, and Kennea NL. Antenatal infection/inflammation and fetal tissue injury. *Best practice & research Clinical*  
590 *obstetrics & gynaecology*. 2007;21(3):479-89.
- 591 4. Polin RA. Systemic infection and brain injury in the preterm infant. *Jornal de pediatria*. 2008;84(3):188-91.
- 592 5. Hagberg H, Peebles D, and Mallard C. Models of white matter injury: comparison of infectious, hypoxic-ischemic,  
593 and excitotoxic insults. *Mental retardation and developmental disabilities research reviews*. 2002;8(1):30-8.
- 594 6. Wang X, Rousset CI, Hagberg H, and Mallard C. Lipopolysaccharide-induced inflammation and perinatal brain  
595 injury. *Seminars in fetal & neonatal medicine*. 2006;11(5):343-53.
- 596 7. Gotsch F, Romero R, Kusanovic JP, Mazaki-Tovi S, Pineles BL, Erez O, Espinoza J, and Hassan SS. The fetal  
597 inflammatory response syndrome. *Clinical obstetrics and gynecology*. 2007;50(3):652-83.
- 598 8. Fahey JO. Clinical management of intra-amniotic infection and chorioamnionitis: a review of the literature. *Journal of*  
599 *midwifery & women's health*. 2008;53(3):227-35.
- 600 9. Fishman SG, and Gelber SE. Evidence for the clinical management of chorioamnionitis. *Semin Fetal Neonatal Med*.  
601 2012;17(1):46-50.
- 602 10. Agrawal V, and Hirsch E. Intrauterine infection and preterm labor. *Semin Fetal Neonatal Med*. 2012;17(1):12-9.
- 603 11. Karrow NA. Activation of the hypothalamic-pituitary-adrenal axis and autonomic nervous system during  
604 inflammation and altered programming of the neuroendocrine-immune axis during fetal and neonatal development:  
605 lessons learned from the model inflammagen, lipopolysaccharide. *Brain, behavior, and immunity*. 2006;20(2):144-58.
- 606 12. Bilbo SD, and Schwarz JM. Early-life programming of later-life brain and behavior: a critical role for the immune  
607 system. *Frontiers in behavioral neuroscience*. 2009;3(14).
- 608 13. van der Valk P, and Amor S. Preactive lesions in multiple sclerosis. *Current opinion in neurology*. 2009;22(3):207-13.
- 609 14. Kettenmann H, Hanisch UK, Noda M, and Verkhratsky A. Physiology of microglia. *Physiological reviews*.  
610 2011;91(2):461-553.
- 611 15. Shytle RD, Mori T, Townsend K, Vendrame M, Sun N, Zeng J, Ehrhart J, Silver AA, Sanberg PR, and Tan J.  
612 Cholinergic modulation of microglial activation by alpha 7 nicotinic receptors. *Journal of neurochemistry*.  
613 2004;89(2):337-43.
- 614 16. Suzuki T, Hide I, Matsubara A, Hama C, Harada K, Miyano K, Andra M, Matsubayashi H, Sakai N, Kohsaka S, et al.  
615 Microglial alpha7 nicotinic acetylcholine receptors drive a phospholipase C/IP3 pathway and modulate the cell  
616 activation toward a neuroprotective role. *J Neurosci Res*. 2006;83(8):1461-70.
- 617 17. Hua S, Ek CJ, Mallard C, and Johansson ME. Perinatal hypoxia-ischemia reduces alpha 7 nicotinic receptor  
618 expression and selective alpha 7 nicotinic receptor stimulation suppresses inflammation and promotes microglial Mox  
619 phenotype. *Biomed Res Int*. 2014;2014(718769).
- 620 18. Cao M, Cortes M, Moore CS, Leong SY, Durosier LD, Burns P, Fecteau G, Desrochers A, Auer RN, Barreiro LB, et  
621 al. Fetal microglial phenotype in vitro carries memory of prior in vivo exposure to inflammation. *Front Cell Neurosci*.  
622 2015;9(294).
- 623 19. Robb A, and Wessling-Resnick M. Regulation of transferrin receptor 2 protein levels by transferrin. *Blood*.  
624 2004;104(13):4294-9.
- 625 20. Schmitz I. Gadd45 proteins in immunity. *Adv Exp Med Biol*. 2013;793(51-68).
- 626 21. Ito YA, Goping IS, Berry F, and Walter MA. Dysfunction of the stress-responsive FOXC1 transcription factor  
627 contributes to the earlier-onset glaucoma observed in Axenfeld-Rieger syndrome patients. *Cell Death Dis*.  
628 2014;5(e1069).
- 629 22. Frasch MG, Szykaruk M, Prout AP, Nygard K, Cao M, Veldhuizen R, Hammond R, and Richardson BS. Decreased  
630 neuroinflammation correlates to higher vagus nerve activity fluctuations in near-term ovine fetuses: a case for the  
631 afferent cholinergic anti-inflammatory pathway? *Journal of neuroinflammation*. 2016;13(1):103.
- 632 23. Achuthan A, Cook AD, Lee MC, Saleh R, Khiew HW, Chang MW, Louis C, Fleetwood AJ, Lacey DC, Christensen  
633 AD, et al. Granulocyte macrophage colony-stimulating factor induces CCL17 production via IRF4 to mediate  
634 inflammation. *J Clin Invest*. 2016;126(9):3453-66.
- 635 24. Das A, Chai JC, Kim SH, Lee YS, Park KS, Jung KH, and Chai YG. Transcriptome sequencing of microglial cells  
636 stimulated with TLR3 and TLR4 ligands. *BMC Genomics*. 2015;16(517).
- 637 25. Wessling-Resnick M. Iron imports. III. Transfer of iron from the mucosa into circulation. *Am J Physiol Gastrointest*  
638 *Liver Physiol*. 2006;290(1):G1-6.
- 639 26. Li Y, Pan K, Chen L, Ning JL, Li X, Yang T, Terrando N, Gu J, and Tao G. Deferoxamine regulates  
640 neuroinflammation and iron homeostasis in a mouse model of postoperative cognitive dysfunction. *Journal of*  
641 *neuroinflammation*. 2016;13(1):268.

- 642 27. Ward RJ, Zucca FA, Duyn JH, Crichton RR, and Zecca L. The role of iron in brain ageing and neurodegenerative  
643 disorders. *Lancet Neurol.* 2014;13(10):1045-60.
- 644 28. Urrutia P, Aguirre P, Esparza A, Tapia V, Mena NP, Arredondo M, Gonzalez-Billault C, and Nunez MT.  
645 Inflammation alters the expression of DMT1, FPN1 and hepcidin, and it causes iron accumulation in central nervous  
646 system cells. *J Neurochem.* 2013;126(4):541-9.
- 647 29. Hong S, Beja-Glasser VF, Nfonoyim BM, Frouin A, Li S, Ramakrishnan S, Merry KM, Shi Q, Rosenthal A, Barres  
648 BA, et al. Complement and microglia mediate early synapse loss in Alzheimer mouse models. *Science.*  
649 2016;352(6286):712-6.
- 650 30. Stephan AH, Barres BA, and Stevens B. The complement system: an unexpected role in synaptic pruning during  
651 development and disease. *Annu Rev Neurosci.* 2012;35(369-89).
- 652 31. Lindblom RP, Berg A, Strom M, Aeinehband S, Dominguez CA, Al Nimer F, Abdelmagid N, Heinig M, Zelano J,  
653 Harnesk K, et al. Complement receptor 2 is up regulated in the spinal cord following nerve root injury and modulates  
654 the spinal cord response. *J Neuroinflammation.* 2015;12(192).
- 655 32. Neher MD, Rich MC, Keene CN, Weckbach S, Bolden AL, Losacco JT, Patane J, Flierl MA, Kulik L, Holers VM, et  
656 al. Deficiency of complement receptors CR2/CR1 in Cr2(-)/(-) mice reduces the extent of secondary brain damage  
657 after closed head injury. *J Neuroinflammation.* 2014;11(95).
- 658 33. Radlowski EC, and Johnson RW. Perinatal iron deficiency and neurocognitive development. *Frontiers in human  
659 neuroscience.* 2013;7(585).
- 660 34. Rao R, and Georgieff MK. Iron therapy for preterm infants. *Clin Perinatol.* 2009;36(1):27-42.
- 661 35. Lieblein-Boff JC, McKim DB, Shea DT, Wei P, Deng Z, Sawicki C, Quan N, Bilbo SD, Bailey MT, McTigue DM, et  
662 al. Neonatal E. coli infection causes neuro-behavioral deficits associated with hypomyelination and neuronal  
663 sequestration of iron. *J Neurosci.* 2013;33(41):16334-45.
- 664 36. Doom JR, and Georgieff MK. Striking while the iron is hot: Understanding the biological and neurodevelopmental  
665 effects of iron deficiency to optimize intervention in early childhood. *Curr Pediatr Rep.* 2014;2(4):291-8.
- 666 37. Hosoi T, Okuma Y, and Nomura Y. Electrical stimulation of afferent vagus nerve induces IL-1beta expression in the  
667 brain and activates HPA axis. *Am J Physiol Regul Integr Comp Physiol.* 2000;279(1):R141-7.
- 668 38. Fraschini M, Demuru M, Puligheddu M, Florida S, Polizzi L, Maleci A, Bortolato M, Hillebrand A, and Marrosu F.  
669 The re-organization of functional brain networks in pharmaco-resistant epileptic patients who respond to VNS.  
670 *Neurosci Lett.* 2014;580(153-7).
- 671 39. Kwan H, Garzoni L, Liu HL, Cao M, Desrochers A, Fecteau G, Burns P, and Frasch MG. VAGUS NERVE  
672 STIMULATION FOR TREATMENT OF INFLAMMATION:SYSTEMATIC REVIEW OF ANIMAL MODELS  
673 AND CLINICAL STUDIES. *Bioelectronic Medicine.* 2016;3(1-6).
- 674 40. Soreq H, and Seidman S. Acetylcholinesterase--new roles for an old actor. *Nat Rev Neurosci.* 2001;2(4):294-302.
- 675 41. Andersson U, and Tracey KJ. Reflex principles of immunological homeostasis. *Annu Rev Immunol.* 2012;30(313-35).
- 676 42. Soreq H. Checks and balances on cholinergic signaling in brain and body function. *Trends Neurosci.*  
677 2015;38(7):448-58.
- 678 43. Friedman A, Kaufer D, Shemer J, Hendler I, Soreq H, and Tur-Kaspa I. Pyridostigmine brain penetration under stress  
679 enhances neuronal excitability and induces early immediate transcriptional response. *Nat Med.* 1996;2(12):1382-5.
- 680 44. Kaufer D, Friedman A, Seidman S, and Soreq H. Acute stress facilitates long-lasting changes in cholinergic gene  
681 expression. *Nature.* 1998;393(6683):373-7.
- 682 45. Sternfeld M, Shoham S, Klein O, Flores-Flores C, Evron T, Idelson GH, Kitsberg D, Patrick JW, and Soreq H. Excess  
683 "read-through" acetylcholinesterase attenuates but the "synaptic" variant intensifies neurodeterioration correlates.  
684 *Proc Natl Acad Sci U S A.* 2000;97(15):8647-52.
- 685 46. Shaked I, Meerson A, Wolf Y, Avni R, Greenberg D, Gilboa-Geffen A, and Soreq H. MicroRNA-132 potentiates  
686 cholinergic anti-inflammatory signaling by targeting acetylcholinesterase. *Immunity.* 2009;31(6):965-73.
- 687 47. Lee AM, Lam SK, Sze Mun Lau SM, Chong CS, Chui HW, and Fong DY. Prevalence, course, and risk factors for  
688 antenatal anxiety and depression. *Obstet Gynecol.* 2007;110(5):1102-12.
- 689 48. Robinson AM, Benzie KM, Cairns SL, Fung T, and Tough SC. Who is distressed? A comparison of psychosocial  
690 stress in pregnancy across seven ethnicities. *BMC pregnancy and childbirth.* 2016;16(1):215.
- 691 49. Biaggi A, Conroy S, Pawlby S, and Pariante CM. Identifying the women at risk of antenatal anxiety and depression: A  
692 systematic review. *J Affect Disord.* 2016;191(62-77).
- 693 50. Durafourt BA, Moore CS, Blain M, and Antel JP. Isolating, culturing, and polarizing primary human adult and fetal  
694 microglia. *Methods Mol Biol.* 2013;1041(199-211).
- 695 51. Langmead B, and Salzberg SL. Fast gapped-read alignment with Bowtie 2. *Nat Methods.* 2012;9(4):357-9.
- 696 52. Kim D, Pertea G, Trapnell C, Pimentel H, Kelley R, and Salzberg SL. TopHat2: accurate alignment of transcriptomes  
697 in the presence of insertions, deletions and gene fusions. *Genome Biol.* 2013;14(4):R36.
- 698 53. Anders S, Pyl TP, and Huber W. HTSeq — A Python framework to work with high-throughput sequencing data.  
699 *bioRxiv.* 2014.

- 700 54. Love MI, Huber W, and Anders S. Moderated estimation of fold change and dispersion for RNA-Seq data with  
701 DESeq2. *bioRxiv*. 2014.
- 702 55. Warnes GR. 2008.
- 703 56. Chen J, Bardes EE, Aronow BJ, and Jegga AG. ToppGene Suite for gene list enrichment analysis and candidate gene  
704 prioritization. *Nucleic Acids Res*. 2009;37(Web Server issue):W305-11.
- 705 57. Kaimal V, Bardes EE, Tabar SC, Jegga AG, and Aronow BJ. ToppCluster: a multiple gene list feature analyzer for  
706 comparative enrichment clustering and network-based dissection of biological systems. *Nucleic Acids Res*.  
707 2010;38(Web Server issue):W96-102.
- 708 58. Franceschini A, Szklarczyk D, Frankild S, Kuhn M, Simonovic M, Roth A, Lin J, Minguez P, Bork P, von Mering C,  
709 et al. STRING v9.1: protein-protein interaction networks, with increased coverage and integration. *Nucleic Acids Res*.  
710 2013;41(Database issue):D808-15.
- 711 59. Mi H, Poudel S, Muruganujan A, Casagrande JT, and Thomas PD. PANTHER version 10: expanded protein families  
712 and functions, and analysis tools. *Nucleic Acids Res*. 2016;44(D1):D336-42.
- 713

# FIGURES

Fetal microglia  $\alpha 7$ nAChR signalling

*Marina Cortes et al.*

**Figure 1.**

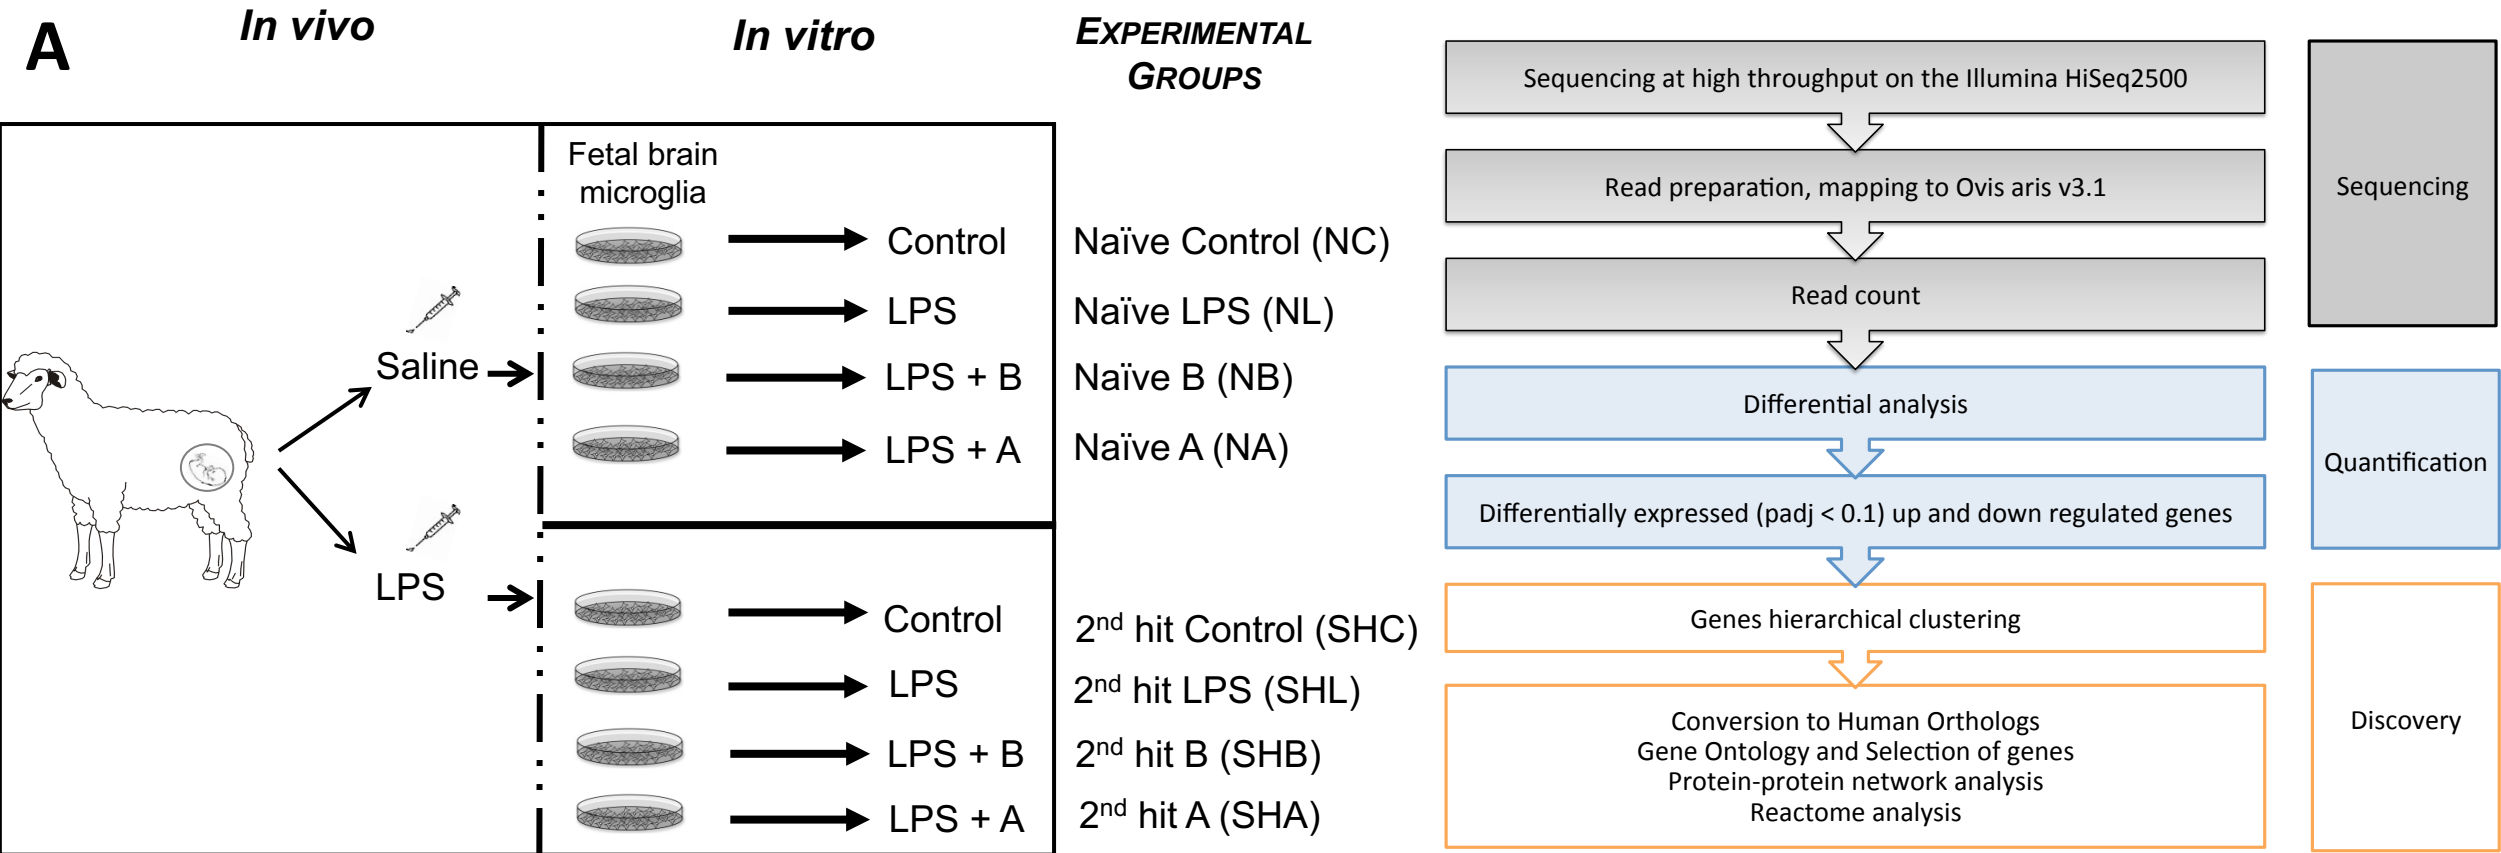

**Figure 1. Experimental design of modulation through  $\alpha 7nAChR$  signaling in a double-hit fetal sheep model. A.** *In vivo*, *in vitro* and RNAseq experiments are illustrated. *In vivo* study, Control (saline); *in vitro* study, cultured cells derived from *in vivo* Control animal, named as Naïve, there are 8 experimental groups: naïve Control (NC), naïve LPS (NL), naïve exposed to  $\alpha$ -Bungarotoxin (NB), naïve exposed to AR-R17779 (NA), and each respective second-hit groups (SH). For RNAseq data comparisons, the group SHA was excluded.



Figure 1.

B

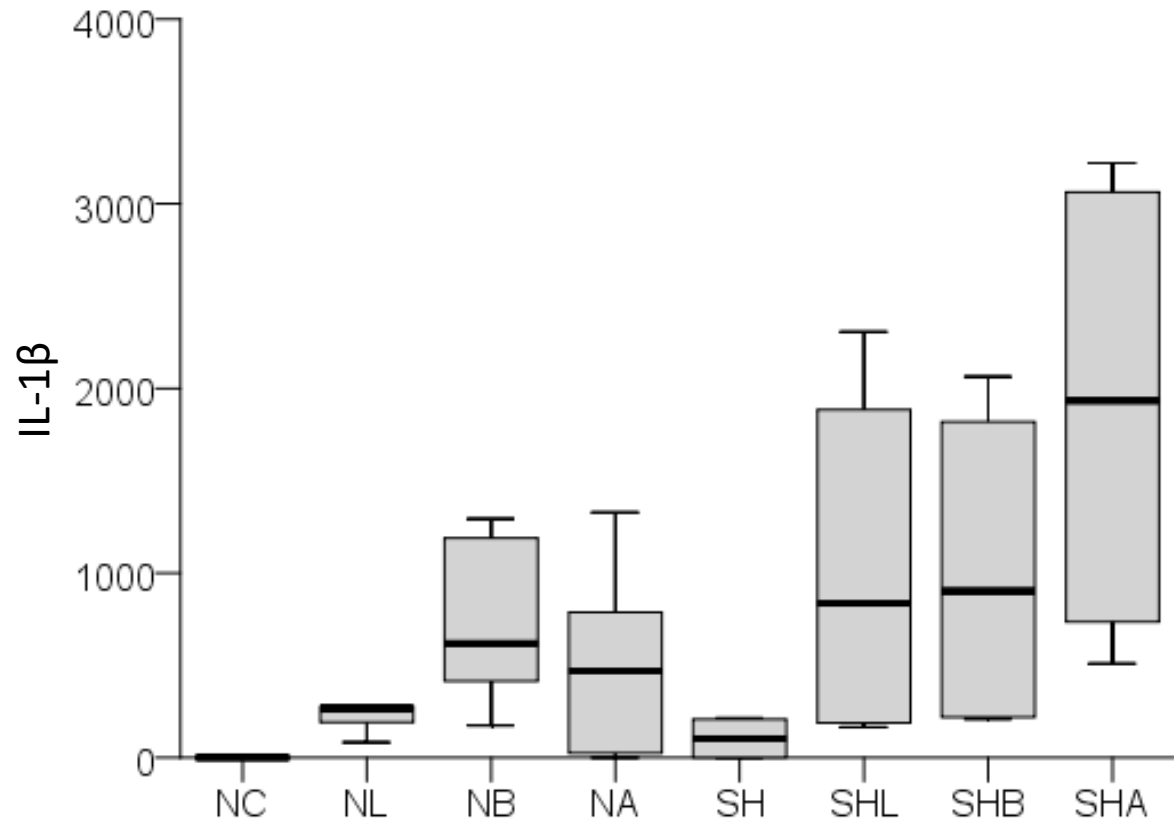

**Figure 1B.** Box plot graph of cytokine IL-1 $\beta$  response obtained for each group of replicates. \* represents an outlier outside 95<sup>th</sup> percentile. GEE model results are presented in text and no significance marks are provided in the figure. Briefly, we found significant main and interaction term effects ( $p < 0.05$ ) for LPS and drug treatment and the contribution of *in vivo* LPS exposure, *i.e.*, SH effect on IL-1 $\beta$  secretion profile.

**Figure 2.**

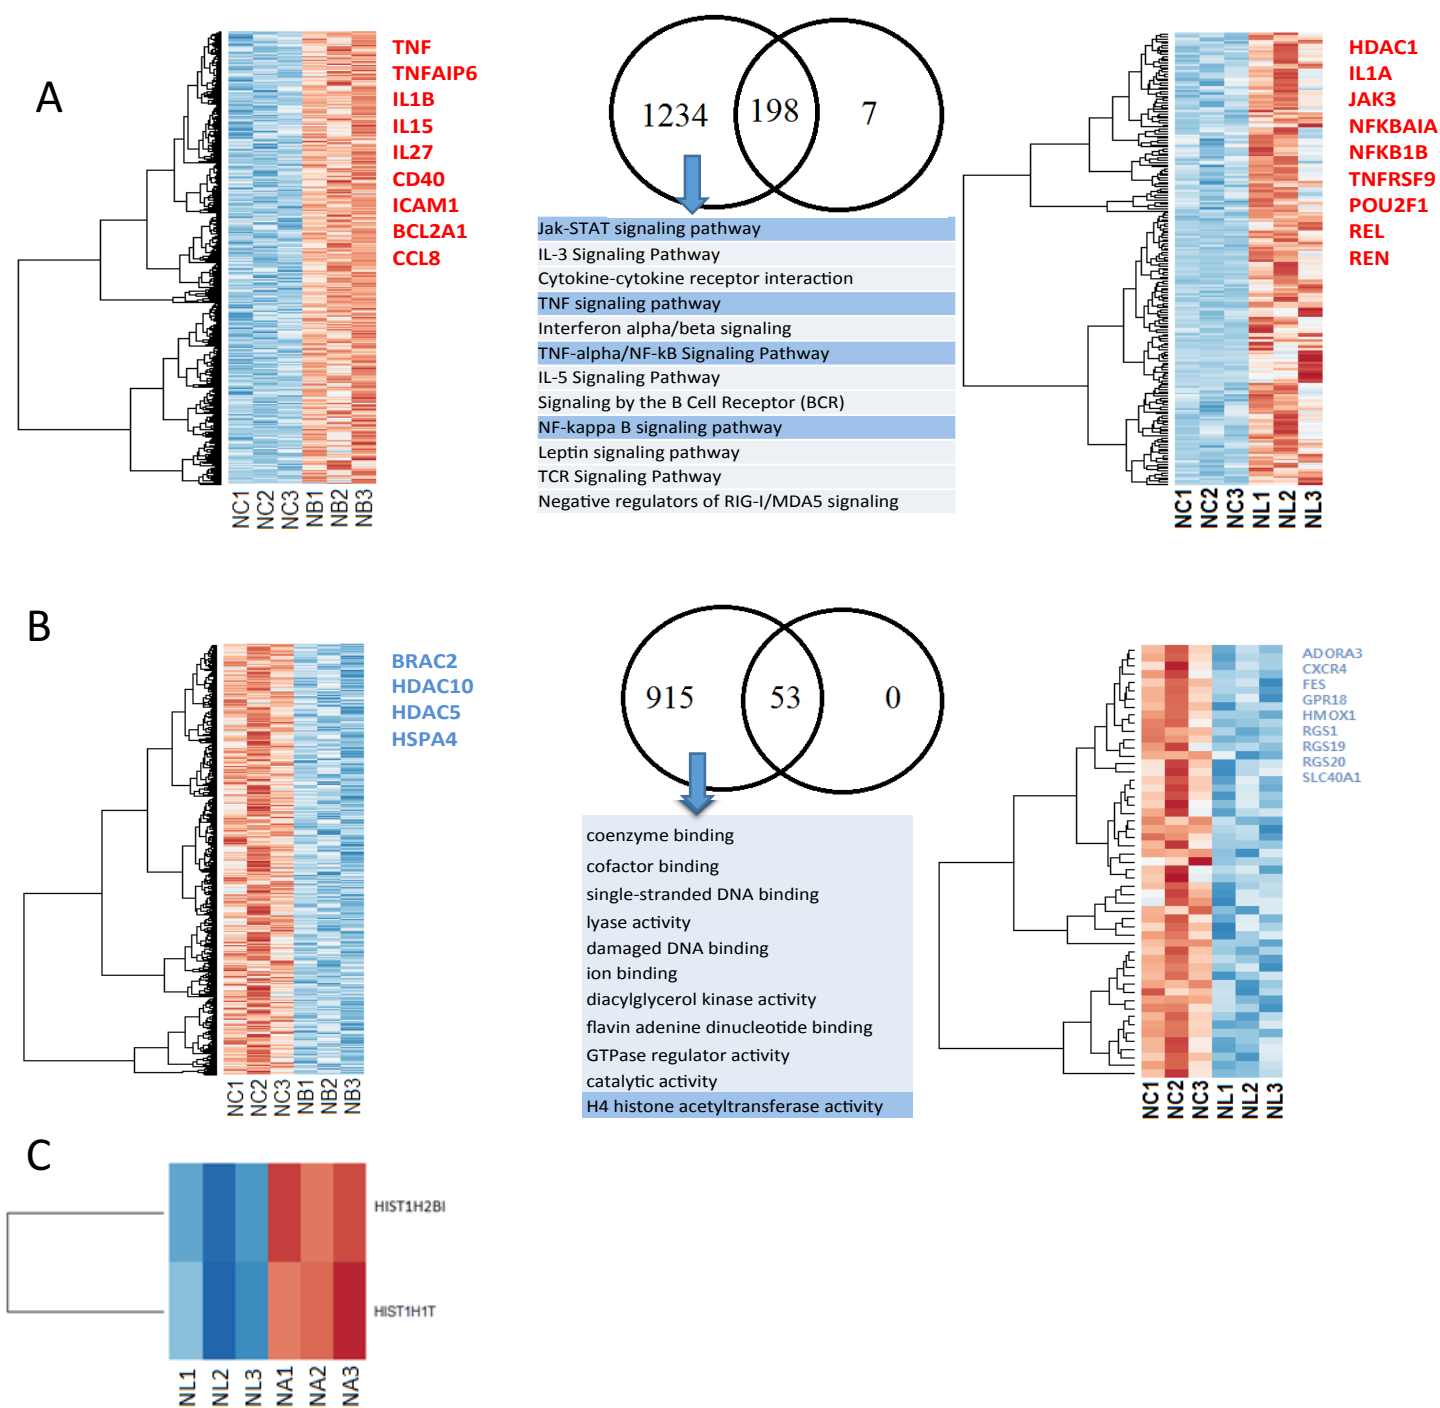

**Figure 2. Stimulation of  $\alpha 7$ nAChR enhances the anti-inflammatory properties of fetal microglia.** Differential analysis of the transcriptome of microglia pre-treated with the  $\alpha 7$ nAChR antagonist  $\alpha$ -Bungarotoxin (NB) and the  $\alpha 7$ nAChR agonist AR-R17779 (NA) compared to controls (NC) and compared to the *in vitro* LPS-treated microglia whose  $\alpha 7$ nAChR activity was not modulated (NL). The Venn diagrams represent the number of unique genes for each group, and in the middle, the number of common genes. Selected genes of interest are written on the right side of each heat map. **A.** Microglia treated with the  $\alpha 7$ nAChR antagonist  $\alpha$ -Bungarotoxin recruited more genes involved in the inflammatory pathway. **B.**  $\alpha$ -Bungarotoxin also increased the response in DE down regulated genes. **C.** NL and NA microglia revealed two DE up regulated histone genes.

Figure 3.

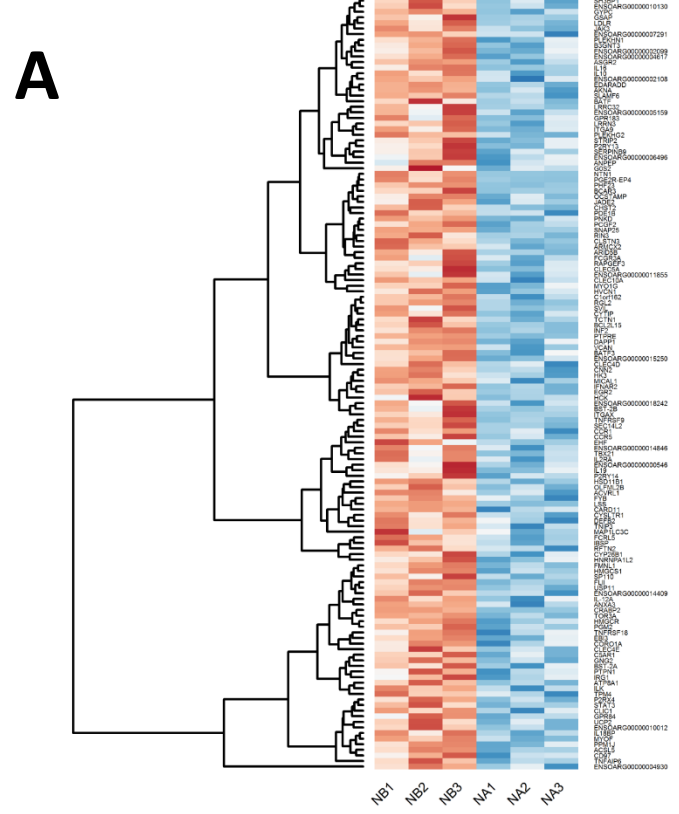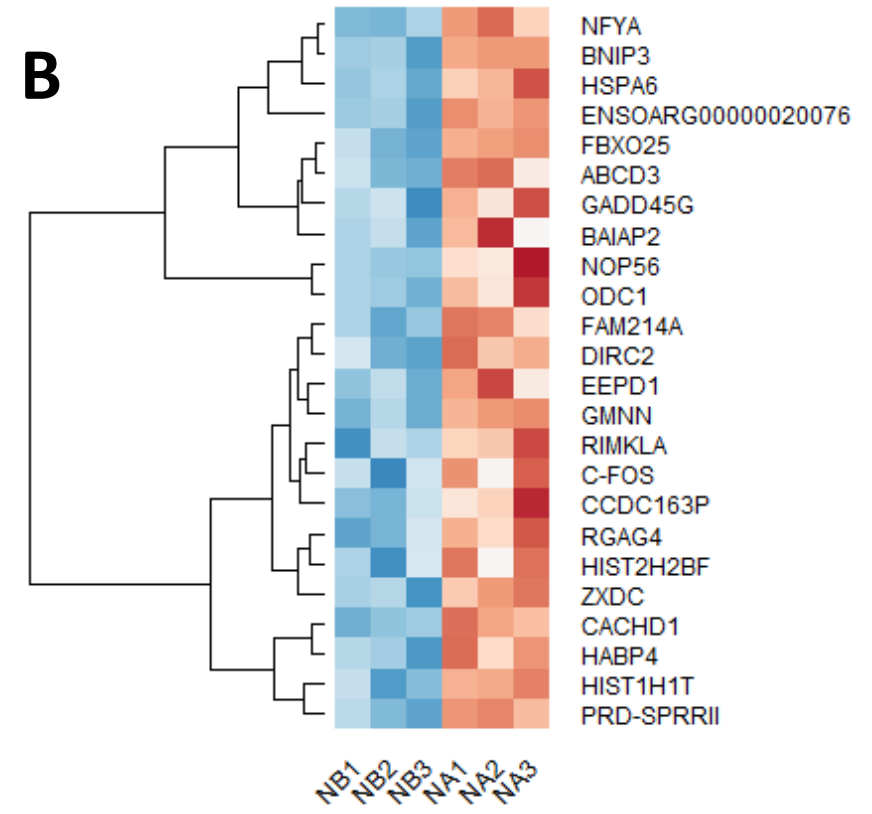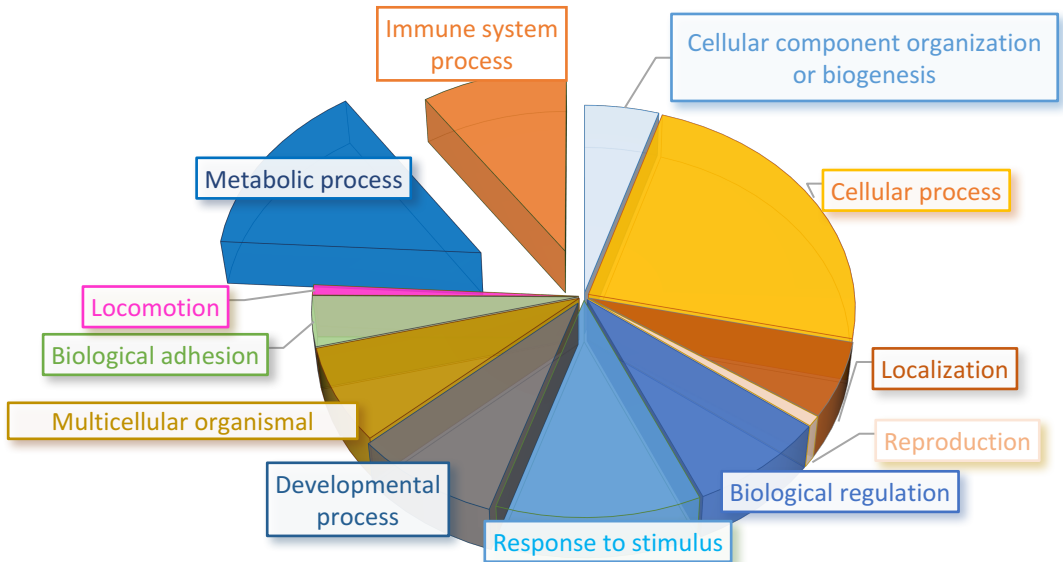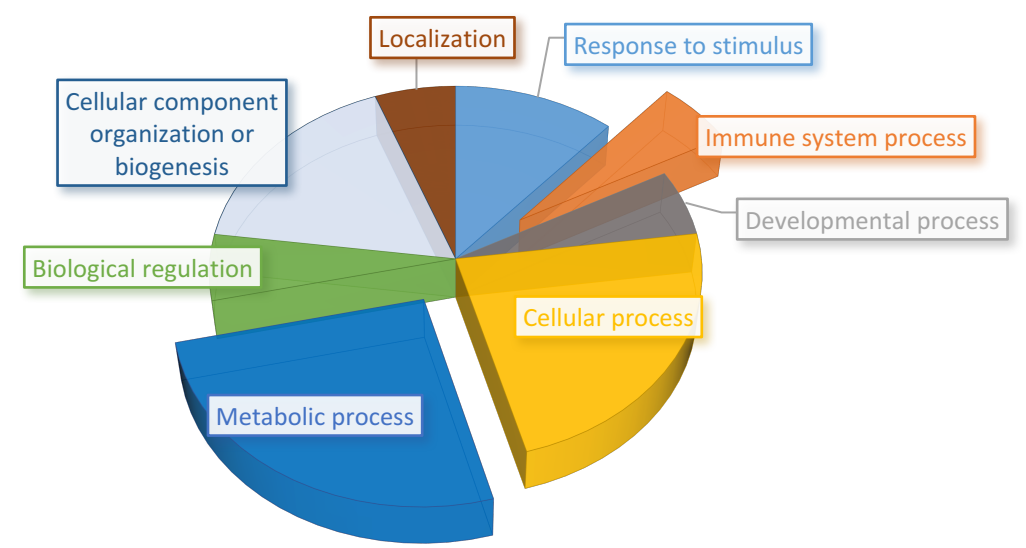

**Figure 3. Differentially expressed genes (DEG, padj < 0.1) in agonist (NA) compared to antagonist-preincubated LPS-exposed naïve microglia (NB).** **A.** Heat map representation of differentially expressed down regulated genes and gene ontology pie chart. **B.** Heat map of up regulated genes in NA, compared to NB. Gene Ontology of each set of DEGs was presented as a pie chart at the bottom of each corresponding heat map. Note that “Immune system” and “Metabolic process” are both strongly down and up regulated, possibly referring to different functions being turned off while others are turned on under the influence of cholinergic signaling through  $\alpha 7nAChR$ .

**Figure 4.**

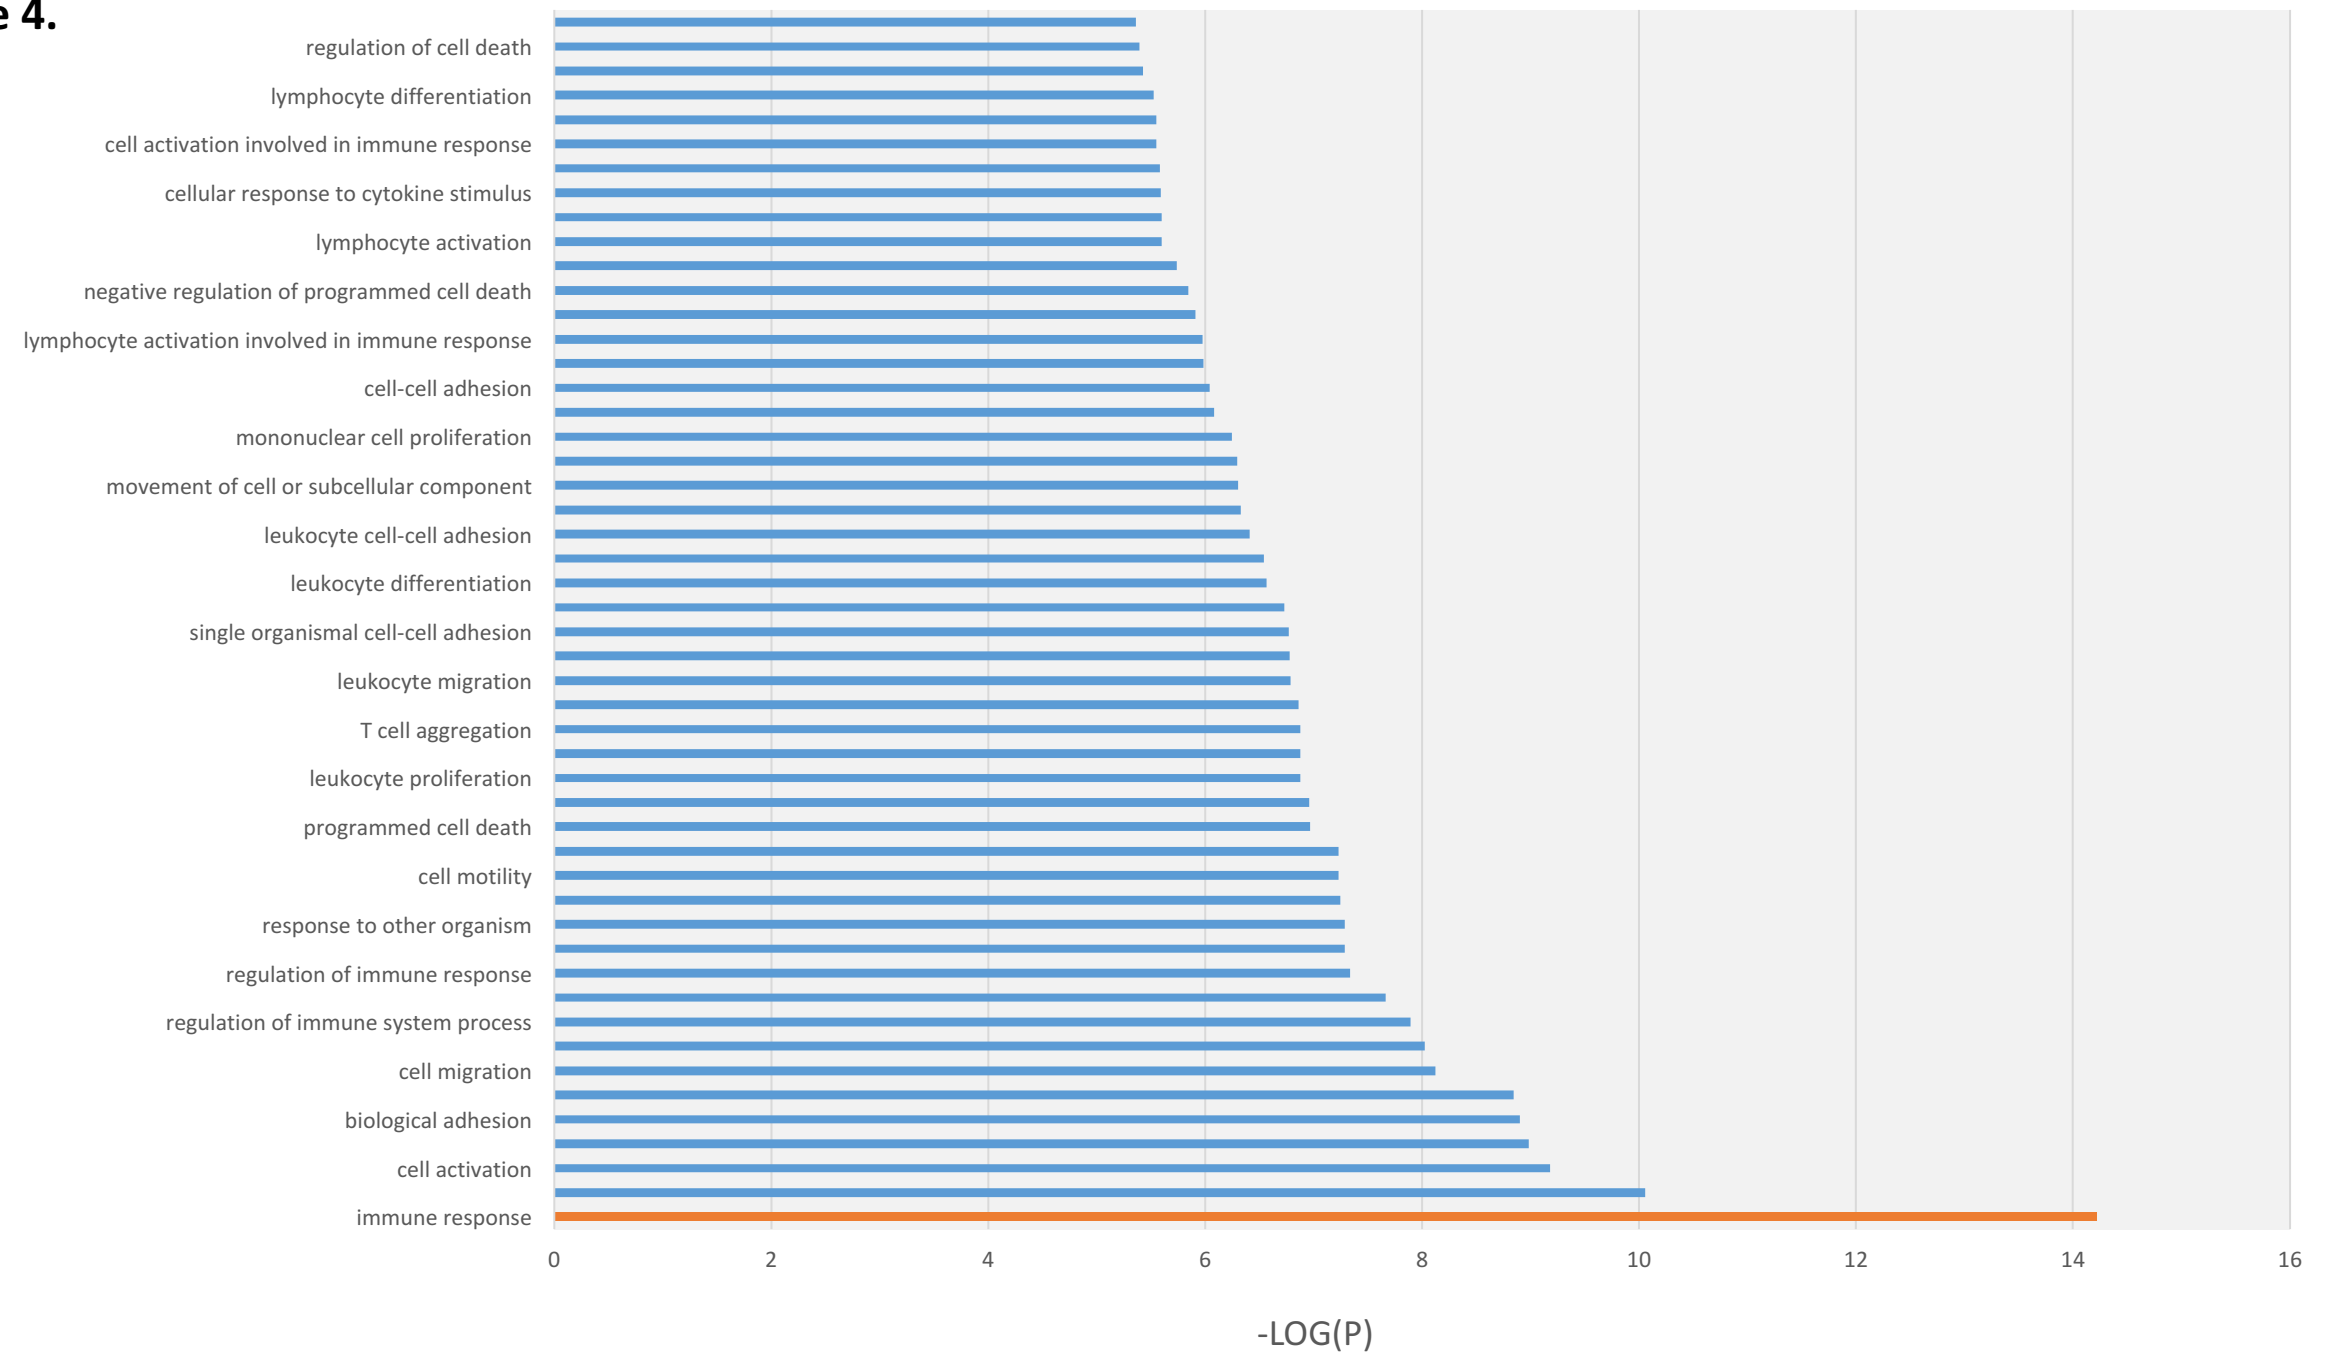



**Figure. 4. Gene ontology analysis with ToppGene of selected DEGs in agonist (NA) compared to antagonist-preincubated LPS-exposed naïve microglia (NB).** Bar graph of 138 DEG down regulated. Each selected GO term ( $P < 10^{-3}$ ) was represented on a  $-\text{Log}(P)$  scale.

**Figure 5A.**

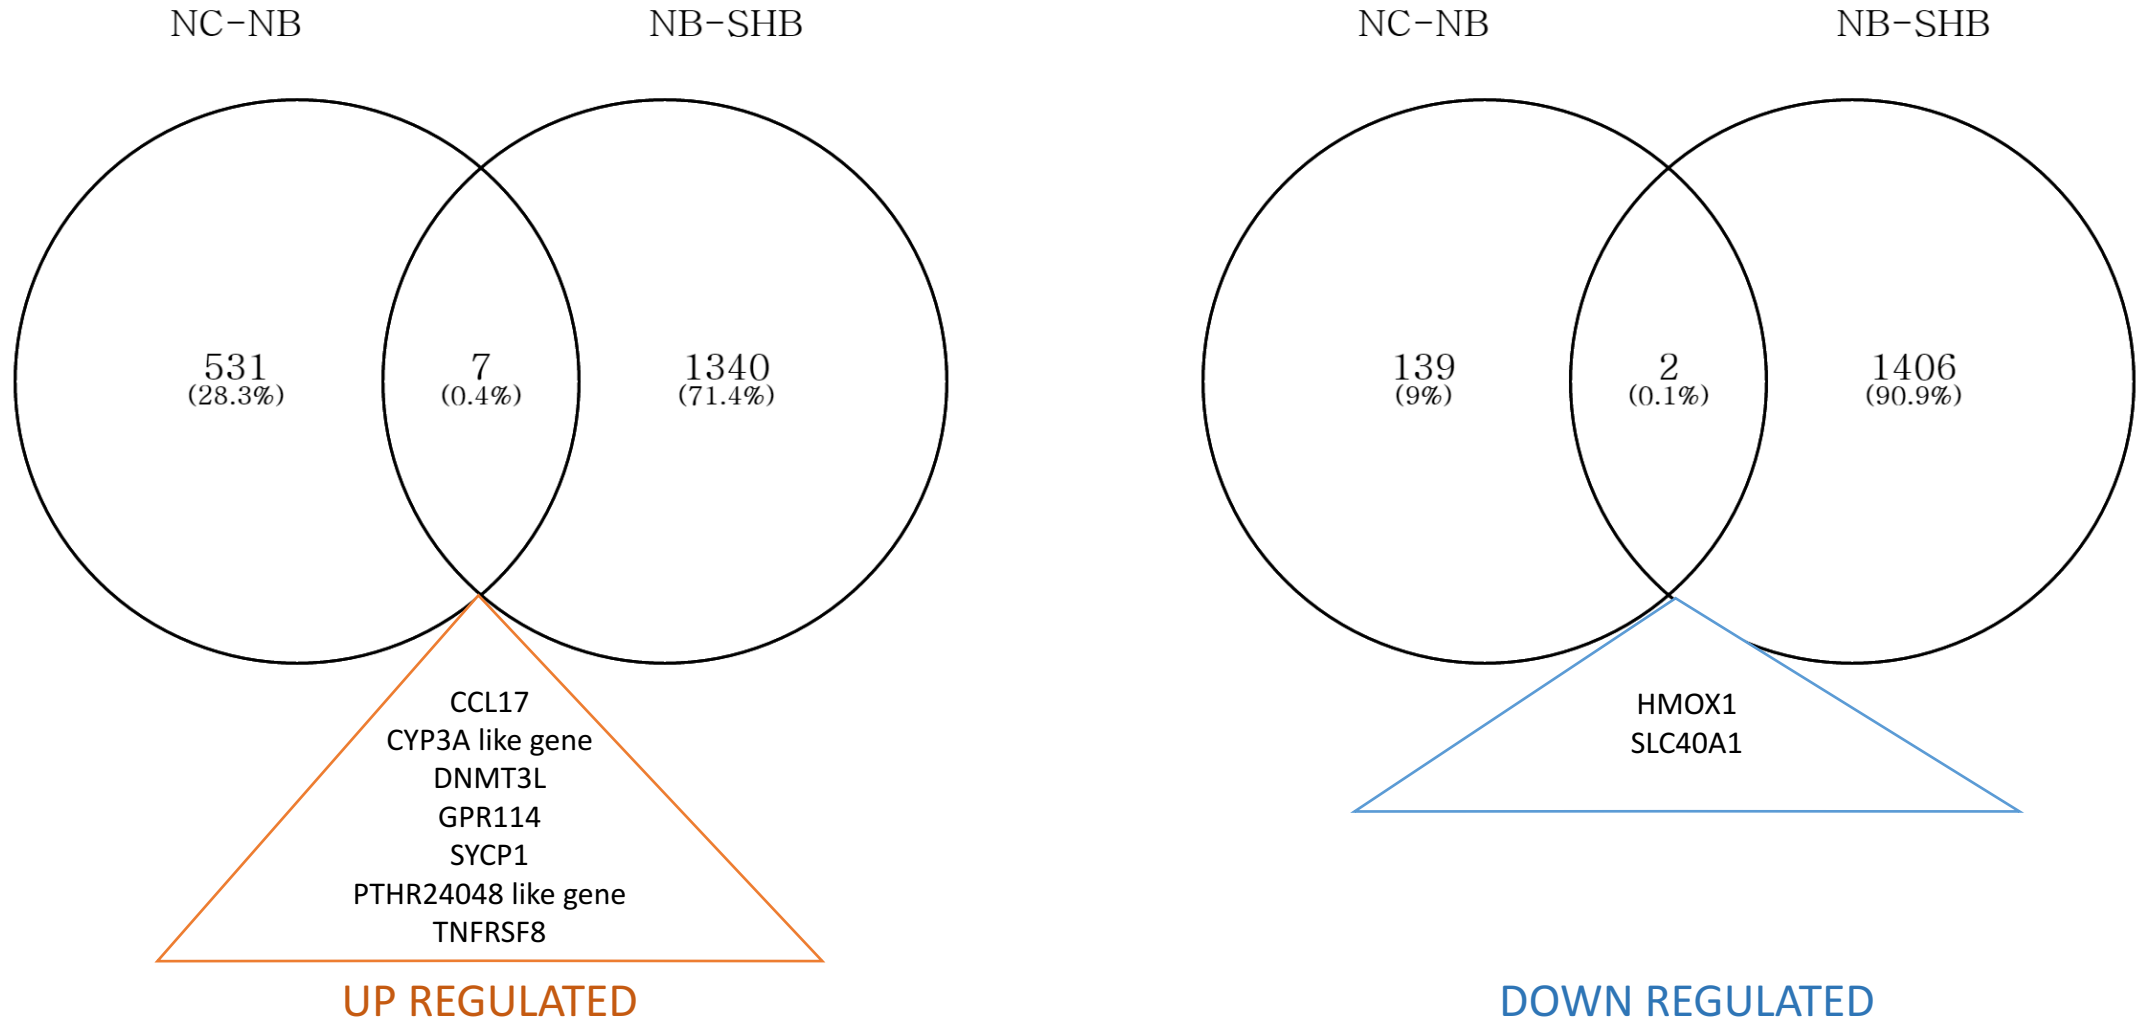

**Figure 5. Stimulation with  $\alpha$ -Bungarotoxin shows a unique transcriptome profile in microglia. A.** Uniquely DEG in SHB ( $p_{adj} < 0.01$ ,  $\text{Log}_2 > |2|$ ). Each set of the common DEGs is written at the bottom of the Venn diagram. **B.** Pathways revealed by Gene Ontology of uniquely differentially expressed down regulated genes in SHB; pathways are represented with their  $-\text{Log}(P)$ .

**Figure 5B.**

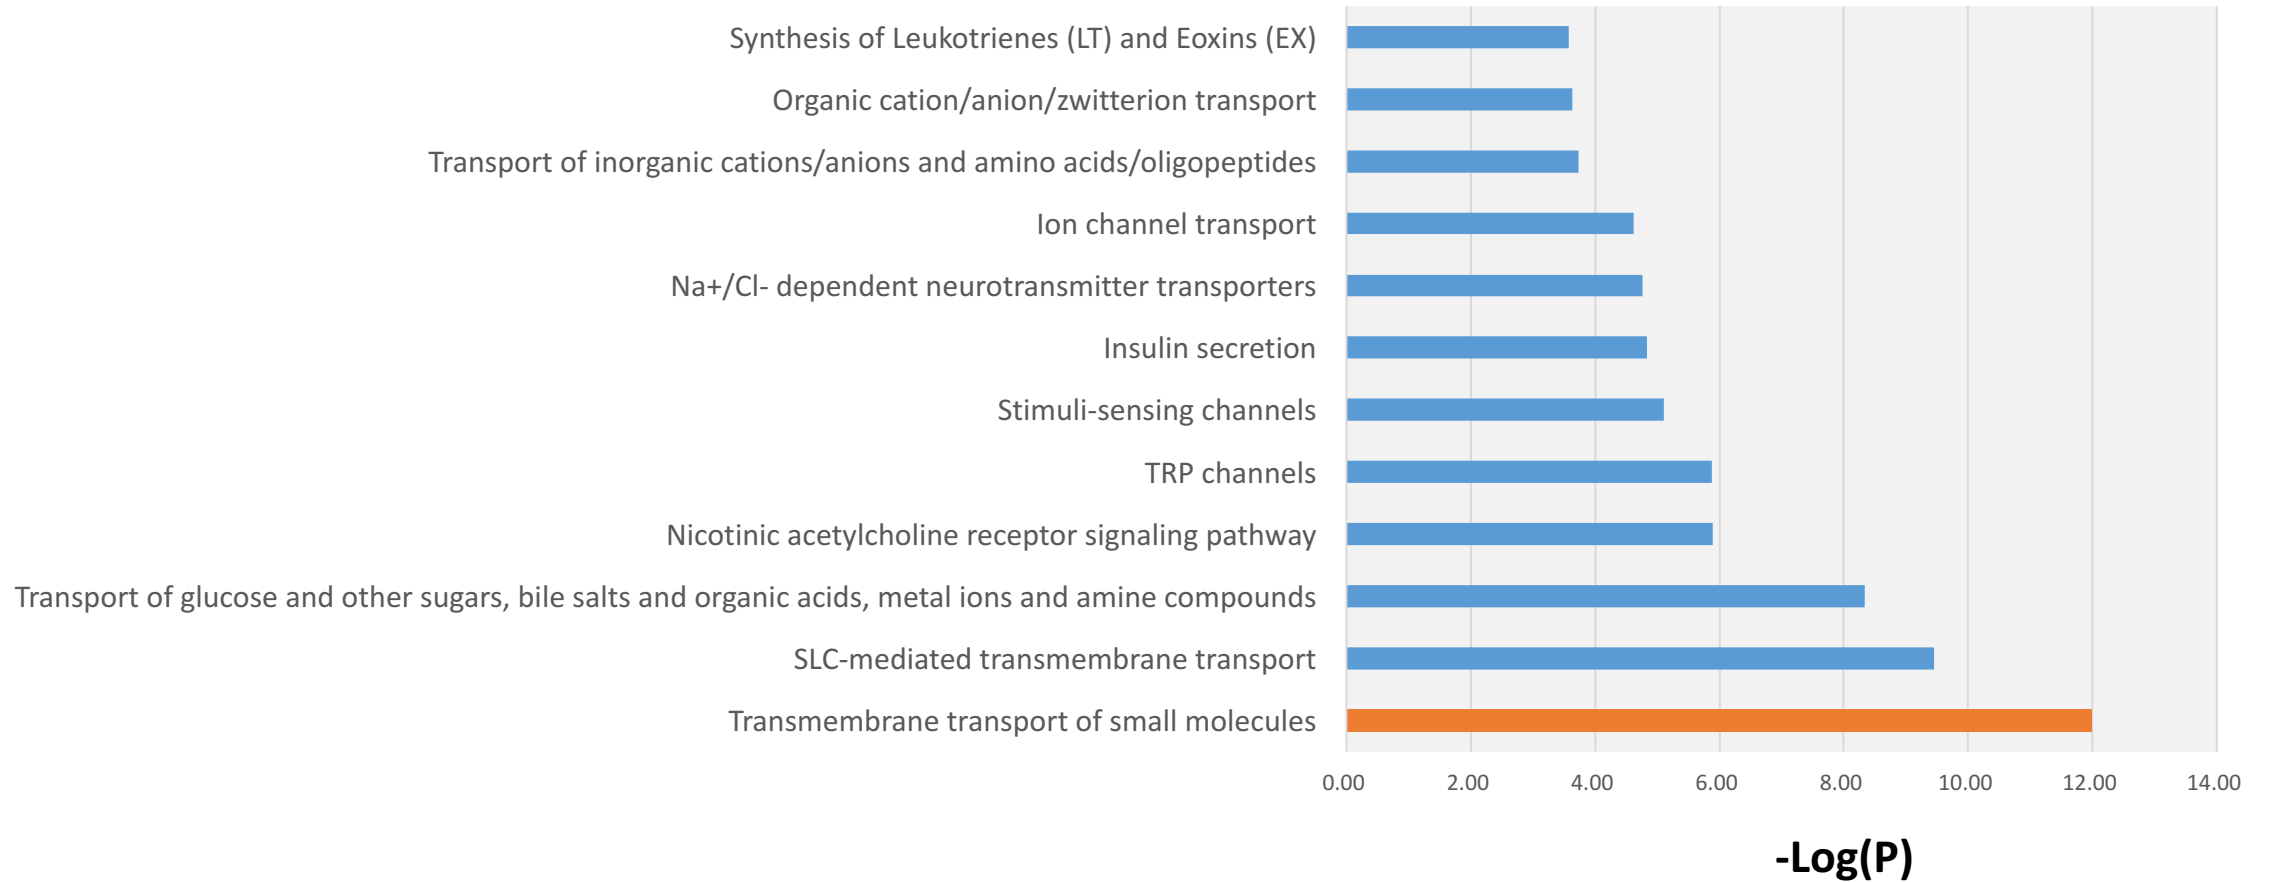

**Figure 5B.** Pathways revealed by Gene Ontology of uniquely differentially expressed down regulated genes in SHB; pathways are represented with their -Log(P).

**Figure 6.**

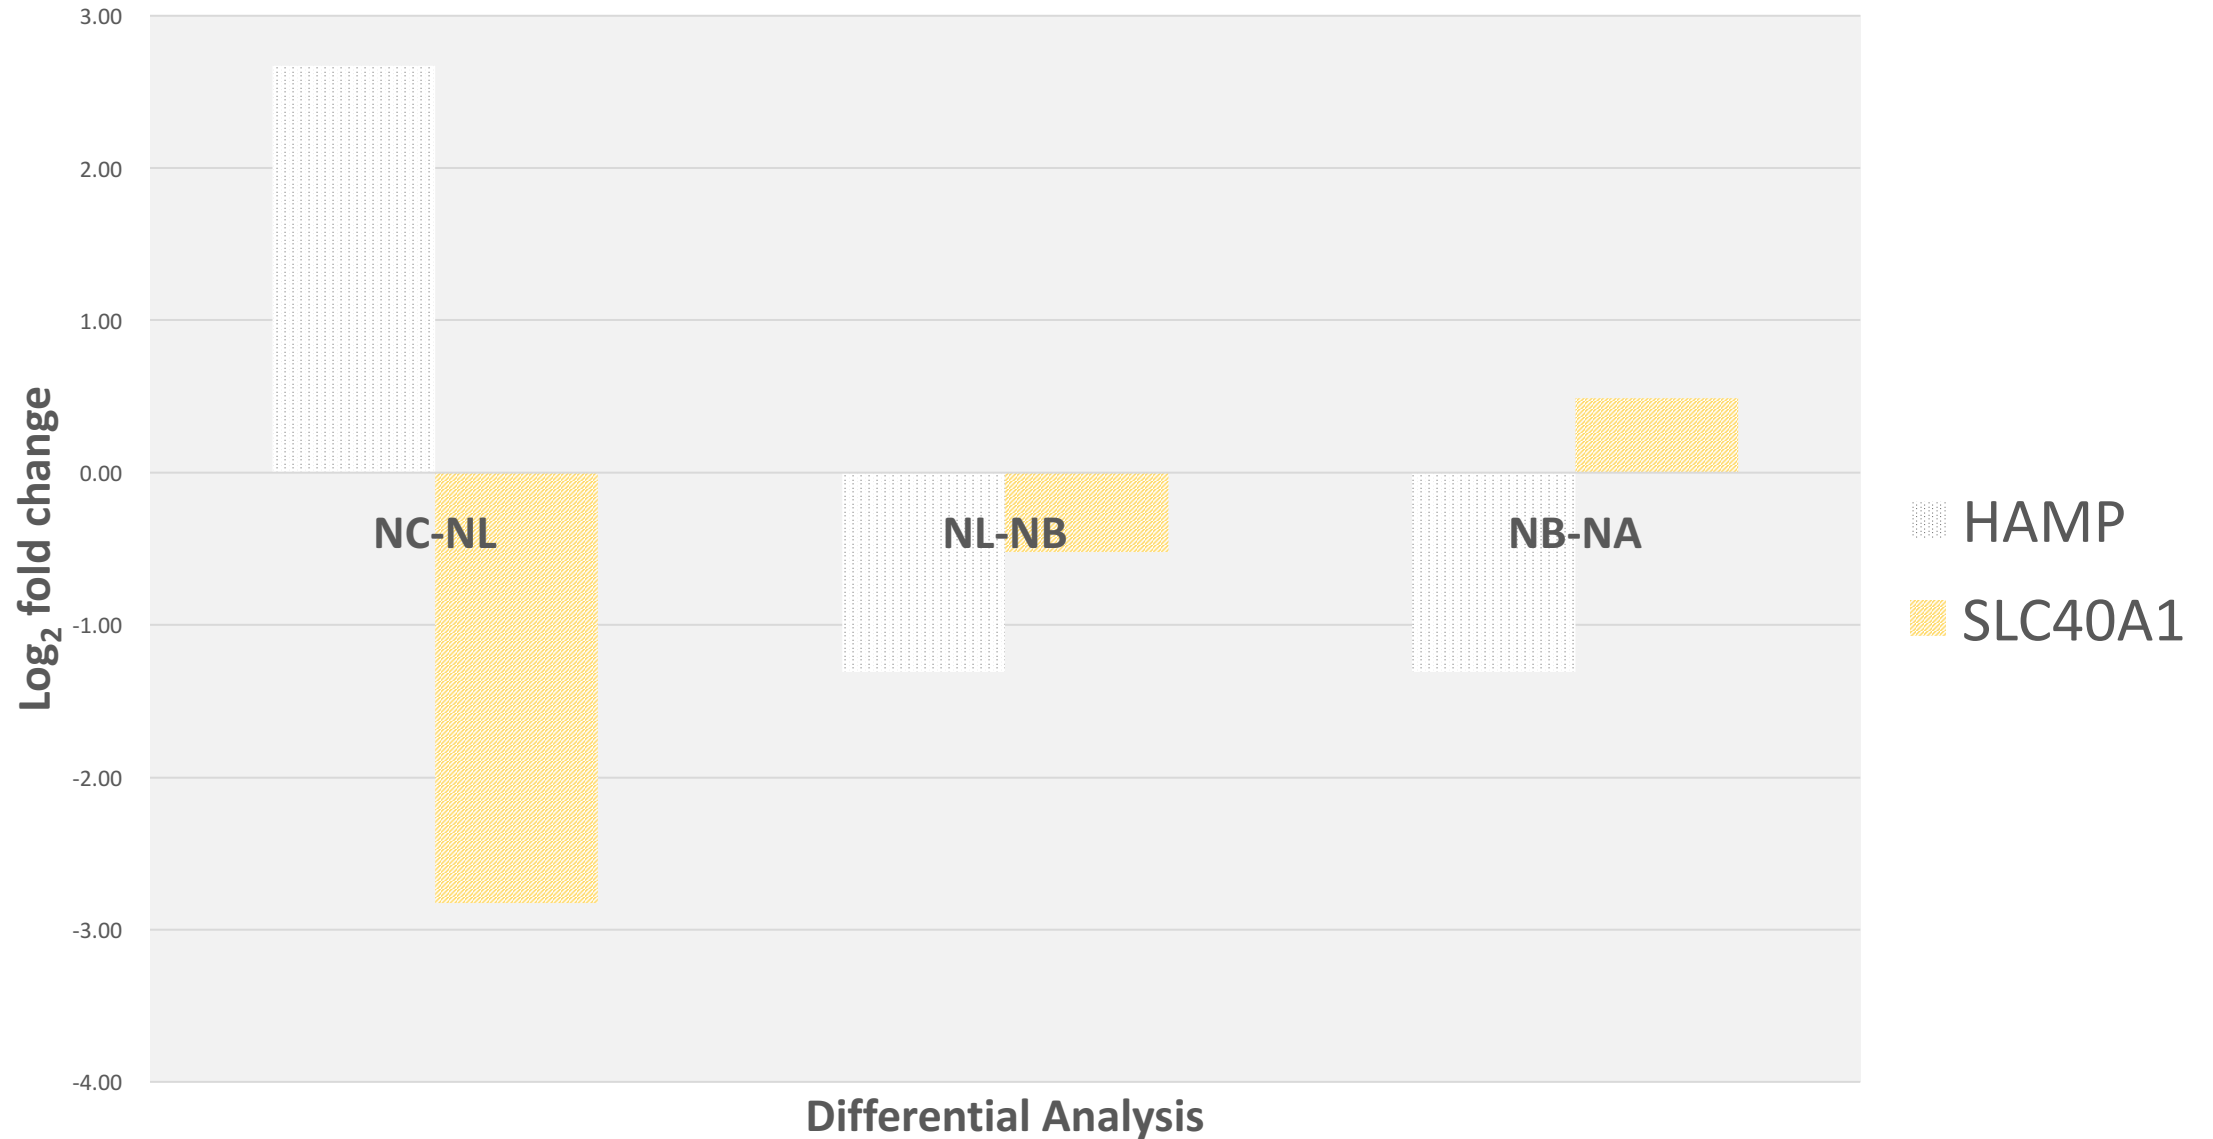

**Figure 6. Genetic expression variation of SLC40A1 and HAMP through  $\alpha 7$ nAChR signaling.** Each differential analysis is noted on the x-axis. The gene SLC40A1 is coding for the protein Ferroportin-1, a transmembrane protein, transporter of iron molecules into the bloodstream. Ferroportin-1 and HAMP have both an opposite pattern in agonist-treated microglia compared to naïve LPS-exposed microglia.

Figure 7.

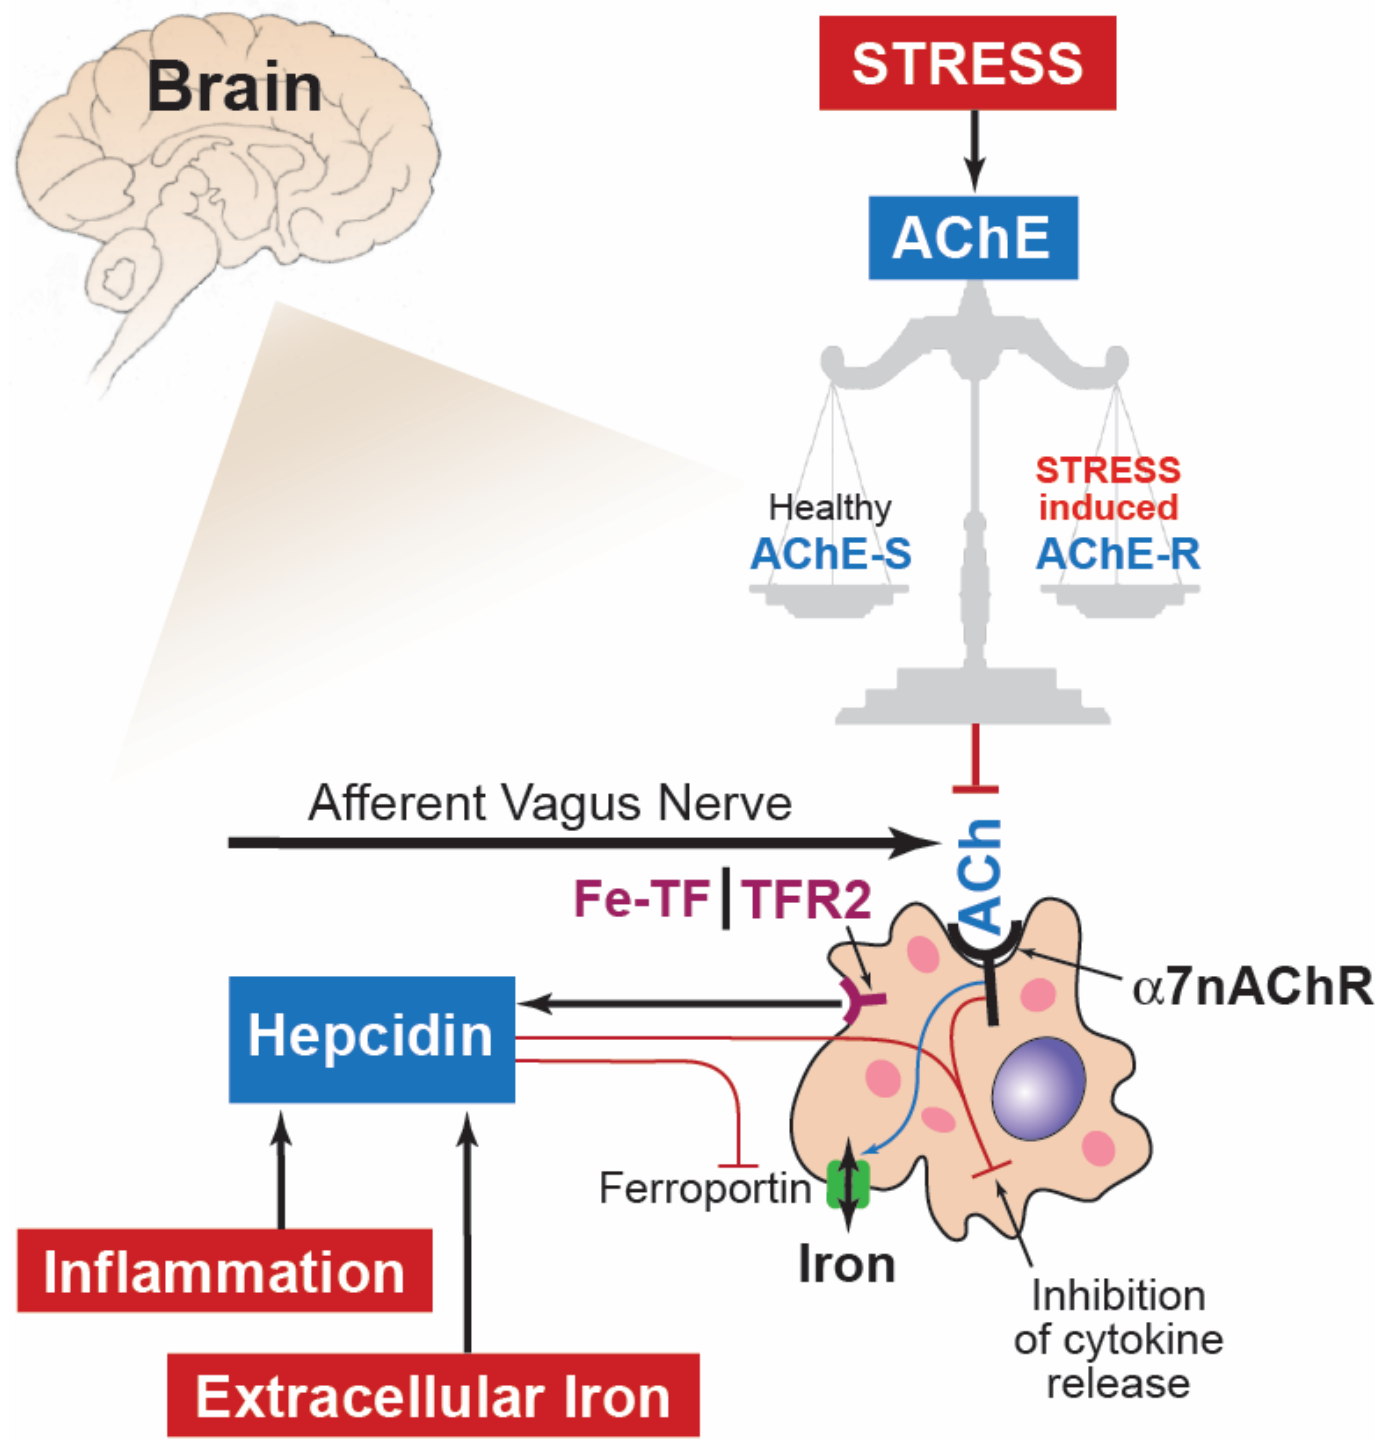

**Figure 7. A model of interactions between iron homeostasis and  $\alpha 7$ nAChR signaling in microglia.** Highlighted in red are the three exogenous factors that may be driving the microglial phenotype: inflammation, iron and stress. The former two stimulate hepcidin which in turn acts on ferroportin to be internalized and degraded. This reduces extracellular iron (sensed as Fe-TF, heme transferrin by TFR2, transferrin receptor 2 [shown here simplified as the representative iron sensor receptor] and increases the intracellular iron, a process referred to as iron sequestration. We propose that ferroportin's membrane localization appears to also be controlled by the  $\alpha 7$ nAChR signaling (blue arrow).  $\alpha 7$ nAChR signaling depends on the acetyl choline (ACh) availability. The latter depends on the afferent vagus nerve cholinergic signaling in the brain via a distributed network as well as the non-vagal sources of ACh controlled by ACh esterase (AChE) activity and the availability of dietary choline. Remarkably, a large body of research has shown that AChE activity depends on chronic stress levels, a factor highly relevant in fetal microglia context in particular, because stress is very common in pregnancy. Stress results in shifts of the post-translational modification of AChE from AChE-S splice variant (healthy) to the less stable AChE-R variant.

Tables



# Table 1.

|                    | NC - NB | NC - SHB | NB - SHB | NC - NA | NL - NA | NB-NA |
|--------------------|---------|----------|----------|---------|---------|-------|
| DE genes*          | 2,400   | 7,314    | 7,340    | 2,007   | 2       | 162   |
| DE* up regulated   | 1,432   | 4,351    | 4,086    | 1,103   | 2       | 24    |
| DE* down regulated | 968     | 2,963    | 3,254    | 904     | 0       | 138   |

\* padj < 0.1

# Table 2.

| Differential analysis | HMOX1 |          | FBP   |          |
|-----------------------|-------|----------|-------|----------|
|                       | Log2  | padj     | Log2  | padj     |
| NL – SHL              | -4.30 | 8.13E-02 | 4.06  | 9.40E-02 |
| NB – SHB              | -4.78 | 3.02E-13 | 3.26  | 3.23E-05 |
| NC – SHB              | -7.07 | 3.92E-40 | 3.06  | 6.86E-04 |
| NB – NA               | 0.17  | 1.00E+00 | -0.72 | 8.45E-01 |

# Table 3.

| Relevance                                    | Gene   | NC-NL         | NC-SHC        | NL-SHL | NB-NA  | NC-NB         | NC-NA  | NB-SHB        |
|----------------------------------------------|--------|---------------|---------------|--------|--------|---------------|--------|---------------|
| HDAC genes : Potential epigenetic regulators | HDAC1  | <b>2.271</b>  | 0.145         | 0.676  | -0.533 | <b>3.006</b>  | 2.470  | -0.690        |
|                                              | HDAC10 | -0.242        | -0.84         | 0.116  | 0.193  | <b>-1.109</b> | -0.914 | 1.140         |
|                                              | HDAC11 | -0.214        | 0.867         | 0.812  | 0.040  | -1.201        | -1.166 | 2.368         |
|                                              | HDAC2  | -0.299        | <b>-2.746</b> | -2.423 | 0.051  | 0.206         | 0.256  | <b>-2.719</b> |
|                                              | HDAC3  | 0.045         | -0.692        | 0.321  | -0.160 | 0.211         | 0.057  | -0.331        |
|                                              | HDAC4  | 1.292         | 1.502         | -0.691 | -0.515 | 0.761         | 0.243  | 0.718         |
|                                              | HDAC5  | -0.869        | 0.333         | 0.501  | 0.260  | <b>-1.614</b> | -1.355 | <b>0.889</b>  |
|                                              | HDAC6  | <b>-0.688</b> | -0.126        | -0.43  | 0.129  | <b>-0.824</b> | -0.695 | 0.250         |
|                                              | HDAC7  | -0.109        | 0.643         | -0.486 | -0.534 | -0.156        | -0.690 | -0.474        |
|                                              | HDAC8  | 0.336         | -0.889        | -2.51  | -0.150 | <b>0.802</b>  | 0.653  | <b>-2.623</b> |
| HDAC9                                        | 0.732  | 1.556         | -1.816        | -0.311 | -0.251 | -0.565        | 0.296  |               |
| Histone Acetyltransferase 1                  | HAT1   | <b>-0.379</b> | -1.639        | -0.865 | 0.564  | -0.137        | 0.431  | <b>-1.470</b> |

# Table 4.

| Description                        | Gene  | NC-NL        | NB - SHB      | NC - NA | NB - NA |
|------------------------------------|-------|--------------|---------------|---------|---------|
| Complement C1Q A chain             | C1QA  | -0.274       | <b>-2.379</b> | -0.081  | -0.227  |
| Complement C1Q B chain             | C1QB  | -0.093       | <b>-2.657</b> | 0.047   | -0.293  |
| Complement component 3a receptor 1 | C3AR1 | <b>1.662</b> | <b>-4.719</b> | 1.301   | -1.571  |
| Complement receptor type 2         | CR2   | 4.549        | <b>5.488</b>  | 1.425   | 2.509   |
